1 Title

# Coheritability and Coenvironmentability as Concepts for Partitioning the Phenotypic Correlation

Jorge Vasquez-Kool

2 Affiliation:

## Coheritability , Coenvironmentability

3

4

Jorge Vasquez-Kool

5

6 Keywords: phenotypic correlation, coheritability, coenvironmentability, bivariate, quantitative

7 traits.

## 8 Abstract

9 Central to the study of joint inheritance of quantitative traits is the determination of the degree  
10 of association between two phenotypic characters, and to quantify the relative contribution of  
11 shared genetic and environmental components influencing such relationship. One way to  
12 approach this problem builds on classical quantitative genetics theory, where the phenotypic  
13 correlation ( $r_{P_{x,y}}$ ) between two traits is modelled as the sum of a genetic component called the  
14 coheritability ( $h_{x,y}$ ), which reflects the degree of shared genetics influencing the phenotypic  
15 correlation, and an environmental component, namely the coenvironmentability ( $e_{x,y}$ ) that  
16 accounts for all other factors that exert influence on the observed trait-trait association. Here a  
17 mathematical and statistical framework is presented on the partition of the phenotypic  
18 correlation into these components. I describe visualization tools to analyze  $r_{P_{x,y}}$ ,  $h_{x,y}$  and  $e_{x,y}$   
19 concurrently, in the form of a three-dimensional (3DHER-plane) and a two-dimensional (2DHER-  
20 field) plots. A large data set of genetic parameter estimates (heritabilities, genetic and  
21 phenotypic correlations) was compiled from an extensive literature review, from which  
22 coheritability and coenvironmentability were derived, with the object to observe patterns of  
23 distribution, and tendency. Illustrative examples from a diverse set of published studies show  
24 the value of applying this partition to generate hypotheses proposing the differential  
25 contribution of shared genetics and shared environment to an observed phenotypic  
26 relationship between traits.

## 27 Introduction

28 A fundamental aspect in the study of heredity is to investigate associations among traits at the  
29 phenotypic level, and to determine the degree shared genetics and common environmental  
30 influences shape such associations. Many traits are analyzed jointly in genetic studies in the  
31 hope of providing greater statistical power to detect associations to causal genetic factors  
32 (Melton et al. 2010, Cheng et al. 2013, Jia and Jannick 2012). Understanding how certain traits  
33 relate to disease risk is of primary concern in clinical medicine (Wellman et al. 2013, Oren et al.  
34 2015, Barabási et al. 2010) and in animal and plant breeding (Sölkner et al. 2008). Most  
35 phenotypes are the result of a complex interaction of multiple genetic and environmental  
36 factors (Lander and Schork 1994), and the ability to assay these characters presents a unique  
37 opportunity to explore mechanisms underlying concerted inheritance.

38 The phenotypic correlation  $r_{P_{x,y}}$  between two traits, say  $x$  and  $y$ , has been extensively used to  
39 quantify the relationship between observable characters. Its partition between a genetic  
40 component and an environmental component was originally worked out by Hazel (1943) as a  
41 function of heritabilities ( $h^2$ ) of the traits and correlations (genetic  $r_{A_{x,y}}$ , environmental  $r_{E_{x,y}}$ )  
42 between them (see equation [ 5 ] below). The term coheritability, coined by Nei (1960) as a  
43 descriptor of the genetic component, is a measure of joint inheritance of two traits that  
44 represents the genetic contribution to their phenotypic correlation. This contrasts with  
45 coenvironmentability,  $e_{x,y}$  that quantifies the contribution of all other sources of variation,  
46 excluding additive genetic factors, influencing the phenotypic correlation. However, the  
47 coheritability as a concept and measure has remained largely unrecognized. In the 1996 edition

48 of *Principles of Quantitative Genetics* the term coheritability was reintroduced more formally  
49 (Falconer and MacKay 1996, p. 317) in the context of correlated response to selection. Yet a  
50 proper treatment of its mathematical and statistical properties is still lacking. Despite its simple  
51 formulation, there is a persistent confusion in the scientific literature of what coheritability  
52 means or how should it be calculated. Some have denoted coheritability as the mere ratio of  
53 additive genetic to phenotypic covariances (de Reggi 1972, Janssens 1979) without sufficient  
54 theoretical support, while others employ the term coheritability (or co-heritability) to refer to  
55 different *ad hoc* measures of coinheritance (Sae-Lim 2015, Hoskens et al. 2018), or colloquially  
56 coinheritance applies to any observed joint transmission of traits (Wambua et al. 2006,  
57 Höblinger et al. 2009). Uncertainty is compounded when coheritability is conflated with genetic  
58 correlation (Yang et al. 2016, Traglia et al. 2017, Yin et al. 2017), or is referred by various  
59 names, such as ‘coefficient of genetic prediction’ (Baradat 1976), ‘correlative heritability’ (Chen  
60 et al. 2003), ‘genetic contribution to the phenotypic correlation’ (Posthuma et al. 2003),  
61 ‘standardized genetic covariance’ (Rao and Rice 2005), ‘bivariate heritability’ (DeStephano et al.  
62 2009), ‘Endophenotype Ranking Value’ (Glahn et al. 2012), and ‘proportion of phenotypic  
63 correlation due to genes’ (Wu et al. 2010, 2013, Muñoz et al. 2018).

64 This study substantially builds up on previous work (Hazel 1943, Lerner 1950, Searle 1961,  
65 Yamada 1968, Bedard et al. 1971, Plomin and DeVries 1979), and connects to modern  
66 investigations (Gui et al. 2017, Pick et al. 2016, Gianola et al 2015) in the attempt to clarify the  
67 nature of coheritability and coenvironmentability as constituent of the phenotypic correlation.  
68 I explore this topic through theoretical arguments and through the analyses of data compiled

69 from a diverse and large number of studies. The objectives of this paper were: (1) to present a  
70 theoretical background on the mathematical and statistical properties of phenotypic  
71 correlation, coheritability and coenvironmentability. (2) Analyze their distribution, dispersion  
72 and tendency. (3) Model the relationship between the phenotypic correlation and  $(h_{x,y}, e_{xy})$   
73 and  $(r_{A_{x,y}}, r_{E_{x,y}})$ . (4) Present illustrative examples on the application of the  $r_{P_{x,y}}$   
74 decomposition in order to gain insight in different biological problems. Further statistical and  
75 mathematical details as well as illustrative examples are provided in the Supplementary  
76 Information (SI) document accompanying this paper.

## 77 **Theoretical Background**

### 78 **The components of the sample phenotypic correlation**

79 In the framework of quantitative genetics, an individual's phenotypic value  $P$  is modelled as the  
80 sum of an additive genetic value  $A$  and an environmental value  $E$ , thus  $P = A + E$ . This simple  
81 decomposition also applies to the phenotypic covariance  $C_{P_{x,y}}$ , which as a measure of linear  
82 association between the phenotypic values of two characters  $x$  and  $y$ , results from the sum of  
83 an additive genetic covariance  $C_{A_{x,y}}$ , and a term including all residual genetic and non-genetic  
84 factors, namely the environmental covariance  $C_{E_{x,y}}$ , thus

$$85 \quad C_{P_{x,y}} = C_{A_{x,y}} + C_{E_{x,y}} \quad [1]$$

86 To standardize, both sides of equation [1] are divided by the geometric mean of the phenotypic  
87 variances of each trait (i.e., which could be construed as the joint *bivariate phenotypic*  
88 *variability* of the traits  $x$  and  $y$ ),

$$89 \quad \frac{C_{P_{x,y}}}{\sqrt{V_{P_x}V_{P_y}}} = \frac{C_{A_{x,y}}}{\sqrt{V_{P_x}V_{P_y}}} + \frac{C_{E_{x,y}}}{\sqrt{V_{P_x}V_{P_y}}} \quad [2]$$

90 This expression can be summarized as follows:

$$91 \quad r_{P_{x,y}} = h_{x,y} + e_{x,y} \quad [3]$$

92 The term  $r_{P_{x,y}} = C_{P_{x,y}} / \sqrt{V_{P_x}V_{P_y}}$  is the phenotypic correlation between the phenotypic values  
93 of characters  $x$  and  $y$ ; it measures the linear association between the two observable  
94 characters.

95 The coheritability, defined by Nei (1960), as

$$96 \quad h_{x,y} = \frac{C_{A_{x,y}}}{\sqrt{V_{P_x}V_{P_y}}} \quad [4]$$

97 is the ratio of the genetic covariance on the bivariate phenotypic variability, is the component  
98 of the phenotypic correlation attributed to shared genetic effects, and thus reflects the extent  
99 that joint genetic influences have on the observed association of the characters.

100 The coenvironmentability (broad-sense),  $e_{x,y} = C_{E_{x,y}} / \sqrt{V_{P_x}V_{P_y}}$ , is the component of the  
101 phenotypic correlation defined as the ratio of the residual covariance (i.e. non-additive genetic,

102 environmental, GxE interactions) to the bivariate phenotypic variability. It represents the joint  
 103 influence of all factors that are not accounted by additive genetic factors that exert influence  
 104 on the observed relationship between the traits.

105 Since covariances can be expressed in terms of their respective variances  $V$  and correlations  $r$ ,

106 such that  $C_{\blacksquare x,y} = \sqrt{V_{\blacksquare x} V_{\blacksquare y}} r_{\blacksquare x,y}$  (where  $\blacksquare$  is either of the subscripts P, A or E). Equation [ 2 ]

107 can be re-written as:

$$\frac{\sqrt{V_{P_x} V_{P_y}} r_{P_{x,y}}}{\sqrt{V_{P_x} V_{P_y}}} = \frac{\sqrt{V_{A_x} V_{A_y}} r_{A_{x,y}}}{\sqrt{V_{P_x} V_{P_y}}} + \frac{\sqrt{(V_{P_x} - V_{A_x})(V_{P_x} - V_{A_x})} r_{E_{x,y}}}{\sqrt{V_{P_x} V_{P_y}}}$$

108 
$$r_{P_{x,y}} = \sqrt{h_x^2 h_y^2} r_{A_{x,y}} + \sqrt{(1 - h_x^2)(1 - h_y^2)} r_{E_{x,y}} \quad [ 5 ]$$

109 where  $h_x^2$  and  $h_y^2$  denote the narrow-sense heritabilities of the traits  $x$  and  $y$ .  $r_{E_{x,y}}$  is the  
 110 environmental correlation, and  $r_{A_{x,y}}$  is the genetic correlation, defined as

111 
$$r_{A_{x,y}} = \frac{C_{A_{x,y}}}{\sqrt{V_{A_x} V_{A_y}}} \quad [ 6 ]$$

112 Equation [5], originally introduced by Hazel (1943, p. 480) in the context of selection indexes,  
 113 models the phenotypic correlation as the sum of a weighed genetic correlation, namely the  
 114 coheritability, which can be expressed as

115 
$$h_{x,y} = \sqrt{h_x^2 h_y^2} r_{A_{x,y}} \quad [ 7 ]$$



116 and a weighed environmental correlation, i.e., the coenvironmentability,

$$117 \quad e_{x,y} = \sqrt{(1 - h_x^2)(1 - h_y^2)} r_{E_{x,y}} \quad [ 8 ]$$

118 The expressions of coheritability given in Equations [4] and [7] are equivalent. Further  
119 equivalent can be done formulations using algebraic summations or by applying a path analytic  
120 method (or structural equation model) (Supplementary Information section 3.2). There are two  
121 more terms associated to the decomposition of the genetic covariance (Equation 1) and which  
122 involve terms of covariation of the breeding values a trait with the environmental values of the  
123 other (e.g.  $C_{A_x, E_y}$ ,  $C_{A_y, E_x}$ ). Some would opt to ignore these terms or consider them negligible,  
124 which is not different than including them in the environmental covariance term  
125 (Supplementary Information section 2.4-2.6). Their importance and influence deserve further  
126 study. From the relationships presented, it is clear that the phenotypic correlation's magnitude  
127 and sign is directly influenced by the coheritability and coenvironmentability.

128

### 129 [The domains of coheritability, coenvironmentability and phenotypic correlation](#)

130 The description of the phenotypic correlation as the sum of the coheritability and  
131 coenvironmentability imposes an intrinsic linear relationship between the three variables.  
132 Since the sum of  $h_{x,y}$  and  $e_{x,y}$  must yield  $r_{P_{x,y}}$ , and the Cauchy-Schwarz inequality proves that  
133 the phenotypic correlation is bound to the domain  $[-1, +1]$ . This implies that if either of the  
134 variables  $h_{x,y}$  or  $e_{x,y}$  becomes zero, then the other variable would become equal to the  
135 phenotypic correlation. Therefore,  $h_{x,y}$  and  $e_{x,y}$  each must also have a domain within  $[-1, +1]$

136 with the added condition that the sum of their absolute values cannot exceed 1 ( $|h_{x,y}| +$   
137  $|e_{x,y}| \leq 1$ ). For instance, if one of the heritabilities is unity, or the  $r_{E_{x,y}} = 0$ , then  $e_{x,y} =$   
138 0, then equation [ 4 ] becomes  $r_{P_{x,y}} = h_{x,y}$ . Similarly, if one the heritabilities or the genetic  
139 correlation is zero, then  $h_{x,y} = 0$ , and it results in  $r_{P_{x,y}} = e_{x,y}$ . All this implies that both  
140 coheritability and coenvironmentability can be subject to the same inferential statistical  
141 methods as those designed for the assessment of correlations (Supplementary Information  
142 section 5.1).

143 The environmental correlation  $r_{E_{x,y}}$ , whose factors may remain unspecified, could be  
144 calculated as a residual derived from [ 4 ]:

$$145 \quad r_{E_{x,y}} = \frac{r_{P_{x,y}} - h_{x,y}}{\sqrt{(1-h_x^2)(1-h_y^2)}} \quad [ 8 ]$$

146 and then use it to determine the (broad-sense) coenvironmentability using equation [ 6 ]. Note  
147 that equation [ 7 ] will introduce dependency and collinearity if applied to a regression model  
148 involving the phenotypic correlation. A superior method would estimate the environmental  
149 correlation independent of the phenotypic correlation and coheritability, and relate to specified  
150 environmental factors. In this case, the coheritability and the narrow-sense  
151 coenvironmentability would not necessarily add up to  $r_{P_{x,y}}$  and should be an indication of that  
152 significant genotype x environment interaction terms are present.

153

154 Visualization of  $\{h_{x,y}, e_{x,y}, r_{P_{x,y}}\}$

155 The three-dimensional coheritability-coenvironmentability-phenotypic correlation plane,  
156 3DHER) plane is a Cartesian three-dimensional space employed to represent these three  
157 variables (Figure 1), where a single datum is defined by its coordinates  $(h_{x,y}, e_{x,y}, r_{P_{x,y}})$ .  
158 Spherical coordinates can also be used to describe the behavior of  $h_{x,y}$ ,  $e_{x,y}$ , and  $r_{P_{x,y}}$   
159 (Supplementary Information section 6.3) and serve as a complementary way to provide further  
160 insight. A first impression from observing this graph is that the data lies on a virtual slanted  
161 plane with zero volume. Mathematical theory tells that this is due to the existence of an  
162 intrinsic linear relationship among the three variables. Further corroboration that the possible  
163 values fall on a plane with zero volume is given by the fact that the determinant of a matrix  
164 involving any three distinct data points is zero (Supplementary Information section 6.4).

165

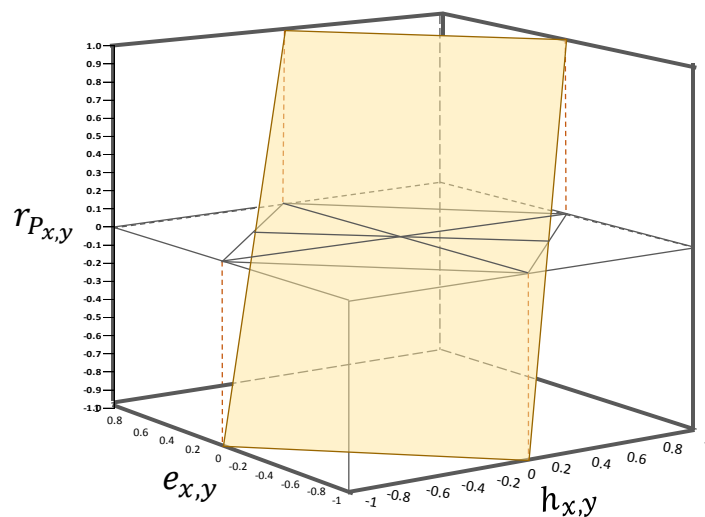

166

167 Figure 1. The three-dimensional  $h_{xy} \cdot e_{xy} \cdot r_{P_{xy}}$ -plane (3DHER-plane) presented in (A) the  
168 Cartesian coordinate system. The plane represents the area where the data of coheritability,  
169 coenvironmentability and phenotypic correlation satisfy the equation  $r_{P_{xy}} = h_{x,y} + e_{x,y}$ ,  
170 where  $r_{P_{xy}}, h_{x,y}, e_{x,y} \in [-1, +1]$ .  
171  
172 The two-dimensional coheritability-coenvironmentability-phenotypic correlation (2DHER) field  
173 is the orthogonal projection of the 3Dplane onto the  $h_{x,y} \cdot e_{x,y}$ -surface when  $r_{P_{xy}} = 0$  (see  
174 Figures 1), this graph retains information of the three variables (Figure 2, Supplementary  
175 Information section 6.4). This field represents an area bound by the relationship  $|h_{x,y}| +$   
176  $|e_{x,y}| = 1$  (i.e. its borders are demarcated by the lines  $h_{x,y} + e_{x,y} = 1$ ,  $h_{x,y} + e_{x,y} = -1$ ,  
177  $h_{x,y} - e_{x,y} = 1$ , and  $h_{x,y} - e_{x,y} = -1$ ). The domain of the phenotypic correlation can be  
178 superimposed on it, knowing that the elements of a data point  $(h_{x,y}, e_{x,y})$  must add to  $r_{P_{xy}}$ .  
179 The field is a continuum domain of  $h_{x,y}, e_{x,y}$  and  $r_{P_{xy}}$ , that accounts for all sign combinations  
180 among these three variables (excluding incongruous combinations consisting of  $h_{x,y}$  and  $e_{x,y}$   
181 having the same sign, yet summing up to an  $r_{P_{xy}}$  with a different sign). For the sake of clarity,  
182 the field can be divided by tracing the lines  $h_{x,y} = 0$ ,  $e_{x,y} = 0$ ,  $r_{P_{xy}} = 0$ . The six triangular  
183 partitions thus produced are labeled with the letter *S* followed by a subscript having a signed  
184 numeral, which is the sign of the coheritability (which in turn is conferred by the genetic  
185 correlation), and the numeral serves as a dummy indicator (Figure 1). The domain for variables  
186  $h_{x,y}, e_{x,y}$  and  $r_{P_{xy}}$  is specific for each partition (Figure 2B). Partitions that share a reciprocal  
187 angle become reciprocal partitions whose labels possess the same numeral by have different

188 signs (i.e. there are three pairs of reciprocal partitions, namely  $S_{+1}$  and  $S_{-1}$ ;  $S_{+2}$  and  $S_{-2}$ ;  $S_{+3}$   
189 and  $S_{-3}$ ). Notice that positive phenotypic correlations are found in partitions  $S_{-3}$ ,  $S_{+1}$ ,  $S_{+2}$ ,  
190 and the negative phenotypic correlations in  $S_{+3}$ ,  $S_{-1}$ ,  $S_{-2}$ . Positive coheritabilities (and  
191 implicitly genetic correlations) are found in partitions  $S_{+1}$ ,  $S_{+2}$ ,  $S_{+3}$ ; and negative  
192 coheritabilities in partitions  $S_{-1}$ ,  $S_{-2}$ ,  $S_{-3}$ . Lastly, partition,  $S_0$ , contain all data with at least  
193 one of the three variables ( $h_{x,y}$ ,  $e_{x,y}$ ,  $r_{P_{x,y}}$ ) equal to zero and therefore lie on one of the diving  
194 lines. The  $S_{+1}$  and  $S_{-1}$  are reciprocal partitions where all the three variables ( $h_{x,y}$ ,  $e_{x,y}$ ,  $r_{P_{x,y}}$ )  
195 have the same sign, either positive ( $S_{+1}$ ) or negative ( $S_{-1}$ ), and each occupy an area equal to  
196 0.5. Both are demarcated by the lines  $h_{x,y} = 0$  and  $r_{P_{x,y}} = 0$ , and line  $h_{x,y} + e_{x,y} = 1$  in the  
197 case of  $S_{+1}$ , and line  $h_{x,y} + e_{x,y} = -1$  for  $S_{-1}$ . The area is equally divided by the line  
198  $h_{x,y} = e_{x,y}$  separating data that satisfy either  $h_{x,y} < e_{x,y}$  or  $h_{x,y} > e_{x,y}$ .

199 The reciprocal partitions  $S_{+2}$  and  $S_{-2}$  are characterized by  $r_{P_{x,y}}$  and  $h_{x,y}$  having the same sign,  
200 positive in the case of  $S_{+2}$ , and negative in the case of  $S_{-2}$ . In these partitions, the magnitude  
201 of coheritability is larger than coenvironmentability, and therefore shows the preponderant  
202 influence of a common genetic component upon the phenotypic correlation. These partitions  
203 occupy an area of 0.25 each and are demarcated by the lines  $r_{P_{x,y}} = 0$  and  $e_{x,y} = 0$ , and either  
204 line  $h_{x,y} - e_{x,y} = 1$  (for  $S_{+2}$ ) or  $h_{x,y} - e_{x,y} = -1$  (for  $S_{-2}$ ). Note that the  
205 coenvironmentability is bound by the interval  $[0, +0.5]$  in  $S_{-2}$ , and  $[-0.5, 0]$  for  $S_{+2}$ . The  
206 reciprocal partitions  $S_{+3}$  and  $S_{-3}$  are characterized by  $r_{P_{x,y}}$  and  $h_{x,y}$  having different signs, due  
207 to the fact that the phenotypic and genetic correlation differ in direction. Each of these

208 partitions cover an area of 0.25, and are delimited by  $r_{P_{x,y}} = 0$  and  $h_{x,y} = 0$ , and line  
209  $h_{x,y} - e_{x,y} = 1$  (for  $S_{+3}$ ) or line  $h_{x,y} - e_{x,y} = -1$  (for  $S_{-3}$ ). In these partitions, the magnitudes  
210 of  $h_{x,y}$  is smaller than the one for coenvironmentability, indicating that there is an overriding  
211 environmental effect on the phenotypic correlation. The line dividing equally partitions  $S_{+1}$  and  
212  $S_{-1}$  separates the instances where  $h_{x,y} < e_{x,y}$  (at the side of Partitions  $S_{-2}$  and  $S_{-3}$ ), and  
213 where  $h_{x,y} > e_{x,y}$  (at the side of  $S_{+2}$ ,  $S_{+3}$ ).

214

**A**

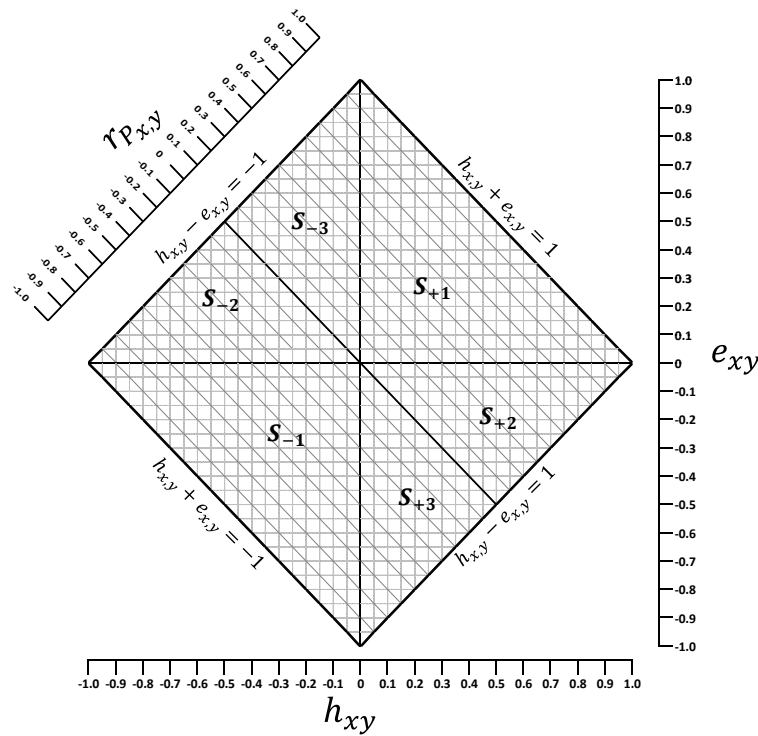

215

**B**

| $r_{P_{xy}}$          | $h_{xy}$            | $e_{xy}$           |          |  | $r_{P_{xy}}$ | $h_{xy}$              | $e_{xy}$           |                     |
|-----------------------|---------------------|--------------------|----------|--|--------------|-----------------------|--------------------|---------------------|
| $-1 < r_{P_{xy}} < 0$ | $-1 < h_{xy} < 0$   | $-1 < e_{xy} < 0$  | $S_{-1}$ |  | $S_{+1}$     | $0 < r_{P_{xy}} < 1$  | $0 < h_{xy} < 1$   | $0 < e_{xy} < 1$    |
| $-1 < r_{P_{xy}} < 0$ | $-1 < h_{xy} < 0$   | $0 < e_{xy} < 0.5$ | $S_{-2}$ |  | $S_{+2}$     | $0 < r_{P_{xy}} < 1$  | $0 < h_{xy} < 1$   | $-0.5 < e_{xy} < 0$ |
| $0 < r_{P_{xy}} < 1$  | $-0.5 < h_{xy} < 0$ | $0 < e_{xy} < 1$   | $S_{-3}$ |  | $S_{+3}$     | $-1 < r_{P_{xy}} < 0$ | $0 < h_{xy} < 0.5$ | $-1 < e_{xy} < 0$   |

216

217 Figure 2. The two-dimensional  $h_{x,y} \cdot e_{x,y} \cdot r_{P_{x,y}}$ -field (2DHER-field). This is the result of the  
 218 projection of the 3D plane onto the  $h_{x,y} \cdot e_{x,y}$  surface. (A) Partitions are demarcated by tracing  
 219 the lines  $r_{P_{x,y}} = 0$ ,  $h_{x,y} = 0$ , and  $e_{x,y} = 0$ . Partitions are labeled with a  $S$  symbol whose  
 220 subscript positive (+) or negative (-) correspond to the sign of the genetic correlation followed  
 221 by a numeral. Partitions denoted with the same numeral but with different sign are reciprocal.  
 222 (B) The domain interval of  $h_{x,y}$ ,  $e_{x,y}$ , and  $r_{P_{x,y}}$  by partition. The equation  $|h_{x,y}| + |e_{x,y}| = 1$   
 223 defines the boundary lines of the field, which are explicitly written at its sides. The total area of  
 224 the field is 2. Partitions  $S_{+1}$  and  $S_{-1}$  occupy each an area of 0.5, while partitions  $S_{+2}$ ,  $S_{-2}$ ,  $S_{+3}$ ,

225 and  $S_{-3}$  each cover an area equal to 0.25. The line  $h_{x,y} = e_{x,y}$  distinguishes all instances where  
226  $h_{x,y} < e_{x,y}$  and  $h_{x,y} > e_{x,y}$ .

227

## 228 Relationship between genetic correlation and heritabilities

229

230 The bivariate correlations and univariate heritabilities are independent, random variables,  
231 variation in one does not lead to a concomitant effect on the other. The weights expressed as  
232 functions of the heritabilities, however, are inversely related: as the geometric mean of the  
233 heritabilities  $\sqrt{h_x^2 h_y^2}$  increases, there is a concomitant decrease of  $\sqrt{(1 - h_x^2)(1 - h_y^2)}$ .  
234 However, larger heritabilities do not necessarily imply larger influence of the genetic  
235 component. For instance, if the heritabilities of the traits are  $h_x^2 = 0.7$ ,  $h_y^2 = 0.8$ , and the  
236 correlations  $r_{A_{x,y}} = 0.15$ ,  $r_{E_{x,y}} = 0.75$ , then the resulting coheritability  $h_{x,y} = 0.111$ , despite  
237 the large heritabilities of the traits, is smaller than the coenvironmentability  $e_{x,y} = 0.1836$ . On  
238 the other hand, a larger genetic correlation does not necessarily translate into a larger genetic  
239 influence either. For example, let us say that  $h_x^2 = 0.2$ ,  $h_y^2 = 0.3$ ,  $r_{A_{x,y}} = 0.615$ ,  $r_{E_{x,y}} = 0.344$ .  
240 The coheritability becomes  $h_{x,y} = 0.15$ , which is smaller than the coenvironmentability  
241  $e_{x,y} = 0.25$ , despite that the latter has a low environmental correlation. This fact may bring  
242 into reconsideration methods that attempt to map the degree of genetic influence on the  
243 phenotypic correlation based on the mere comparison of  $r_{P_{x,y}}$  and  $r_{A_{x,y}}$ . Rank between these  
244 statistics is not preserved when using the totality of the data.



245 If, on the other hand, one of the variable is set to a specified value, it would effectively limit the  
246 range of possible values on the other variables. Questions such as, given the value of a  
247 phenotypic correlation, what would be the possible values of the coheritability and  
248 coenvironmentability?, or, condition on specified values of coheritability and  
249 coenvironmentability, what are the possible values of the heritabilities of the traits and the  
250 genetic and the environmental correlations? These topics are duly elaborated in the  
251 supplementary information (SI section 7.1 and 7.2) in an empirical manner that yield possible,  
252 not probable, values. This is primarily meant to lay the groundwork for more rigorous  
253 development.

254

255 [The relationship of the magnitudes of the coheritability and of the genetic correlation.](#)

256

257 If the heritabilities of the traits are each unity, then the coenvironmentability becomes zero,  
258 the coheritability equates the genetic correlation, and only under this extreme condition,  
259  $r_{P_{x,y}} = r_{A_{x,y}}$ . In the majority of the cases, however, the absolute value of the coheritability  
260 would always be less than the absolute value of the genetic correlation. The geometric mean of  
261 the heritabilities,  $\sqrt{h_x^2 h_y^2}$ , itself a decimal number between 0 and 1, multiplied to the genetic  
262 correlation results in the product (i.e. coheritability) with a smaller magnitude, such that the  
263 coheritability would move away from the  $r_{A_{x,y}}$  towards the origin. For instance, if  $\sqrt{h_x^2 h_y^2} =$   
264  $0.2$ ,  $r_{A_{x,y}} = -0.4$ , then  $h_{x,y} = -0.08$ . The latter is closer to zero than  $r_{A_{x,y}}$ . If  $\sqrt{h_x^2 h_y^2} = 0.35$ ,

265  $r_{A_{x,y}} = 0.5$ , then  $h_{x,y} = 0.175$ , which also moves towards the zero direction Therefore, in  
266 terms of magnitude, the coheritability would be equal of less than the magnitude of the genetic  
267 correlation,

$$h_{x,y} \in \begin{cases} [r_{A_{x,y}}, 0) & \text{if } r_{A_{x,y}} < 0 \\ 0 & \text{if } r_{A_{x,y}} = 0 \\ (0, r_{A_{x,y}}] & \text{if } r_{A_{x,y}} > 0 \end{cases}$$

## 268 Inference

269 Details on the characteristics of the base population and the sample, as well as aspects  
270 concerning hypothesis testing and confidence intervals determination for coheritability,  
271 coenvironmentability and phenotypic correlation are duly elaborated in the Supplementary  
272 Information sections 1 and 5. In brief, consider a large, genetically-structured population  
273 whose individuals possess heritable traits  $(h_x^2, h_y^2)$ , and with genetic  $\rho_{A_{x,y}}$ , environmental  $\rho_{E_{x,y}}$ ,  
274 and phenotypic correlation  $\rho_{P_{x,y}}$  between the traits, the latter being the sum of the population-  
275 level coheritability  $H_{x,y}$  and coenvironmentability  $E_{x,y}$  parameters  $\rho_{P_{x,y}} = H_{x,y} + E_{x,y}$ . It is,  
276 therefore, feasible to make propositions about these population parameters using data  
277 obtained from sampling. If a sample of size  $n$  is obtained from such population, one could  
278 hypothesize the values of the parameters  $\rho_{P_{x,y}}$ ,  $H_{x,y}$ , and  $E_{x,y}$ , provided that they satisfy the  
279 relationship  $\rho_{P_{x,y}} = \sqrt{h_x^2 h_y^2} \rho_{A_{x,y}} + \sqrt{(1-h_x^2)(1-h_y^2)} \rho_{E_{x,y}}$ . The distribution of the  
280 estimator of  $\rho_{P_{x,y}}$  is the sample phenotypic correlation  $r_{P_{x,y}}$  is construe to be the distribution of  
281 the correlation coefficients determined from  $m$  samples, all of size  $n$ , drawn from the original  
282 population (see Supplementary Information section 4 for derivation of sampling distribution of

283 the correlation coefficient, Fisher 1915, Hotelling 1959). Naturally, sample size is an important  
284 consideration for estimation and hypothesis testing. Under a condition of moderate ( $70 < n \leq$   
285  $100$ ) to large sample sizes ( $n > 100$ ), asymptotic properties of the statistics can be assumed  
286 (Supplementary Information section 6). Other aspects of statistical inference on  
287  $r_{P_{x,y}}, r_{A_{x,y}}, r_{E_{x,y}}, h_{x,y}$ , and  $e_{x,y}$  such as hypothesis testing, power, and confidence level of  
288 parameters, as well as aspects of experimental design regarding determination of an adequate  
289 sample size are presented in Supplementary Information section 5.

290

#### 291 Simulation of bivariate $(h_{x,y}, e_{x,y})$ data

292 Simulation is fundamental to further an understanding on probabilities, estimation of the  
293 sampling distribution of statistics, calculation of coverage probability of confidence intervals,  
294 and to evaluate the robustness of statistical tests (Wicklín 2013). To facilitate these paths of  
295 inquiry, a method to generate bivariate  $(h_{x,y}, e_{x,y})$  observations is presented (Supplementary  
296 Information section 10) based on a transformation of two random uniform random variables.

297

298

## 299 Materials and Methods

### 300 Data compilation and validation

301 An extensive search of data published in journal articles was carried out using bibliographic  
302 sources such as PubMed, Web of Science, GoogleScholar. The search was carried out using  
303 keywords: ‘coheritability’, ‘genetic parameters’, ‘phenotypic and genetic correlations’,  
304 ‘correlated response’, ‘age-age correlations’, and ‘early selection’, ‘fitness trade-offs’. To be  
305 included in the compilation (see Flow chart in Supplementary Material, File D1), the reported  
306 data had to involve continuous traits and minimally include trait heritabilities and at least two  
307 correlations (phenotypic, genetic, or environmental). Information was also gathered about the  
308 organism studied, standard errors of the parameter estimates (if any), and bibliographic  
309 citation. Coheritabilities and coenvironmentabilities were then calculated using equations [4]  
310 to [7]. The data was categorized into partitions according to the criteria expounded in  
311 Theoretical Background and summarized in Figure 2.

312 To ensure validation, three criteria were used for outlier detection, failure to satisfy at least one  
313 of them led to its exclusion from the data set: The first criterion checked whether the values of  
314 heritabilities and correlations were within their domains ( $h^2 \in [0,1]$ ,  $r \in [-1,1]$ ). A second  
315 criterion ascertained whether a given datum was within the boundaries of the 2DHER-field by  
316 holding the relationship  $|h_{x,y}| + |e_{x,y}| \leq 1$ . Finally, the data had to satisfy the relationship  
317  $|r_{P_{x,y}}| + D \leq 1$ , ( $D$ , disparity index, see below) to indicate that the values of  $r_{P_{x,y}}$  and  
318  $r_{A_{x,y}}$  were coherent to the relationship expressed in equation [ 4 ]. Analyses of descriptive and

319 inferential statistical analyses were carried out using SAS/STAT Software (SAS Institute, Cary,  
320 NC).

321

### 322 [Analysis of count data](#)

323

324 It was of particular interest to see if the occupancy of the data in partitions ( $S_0, S_{+1}, S_{+2},$   
325  $S_{+3}, S_{-1}, S_{-2}, S_{-3}$ ) came from independent trials. If each of  $n$  independent trials result in  
326 placing the data to one of the  $k$  partitions and the probability that a (collected) datum belongs  
327 to a given partition, is the same in every trial, then the count of the data in the partitions would  
328 follow a multinomial probability distribution. A goodness-of-fit test for multinomial  
329 distribution was therefore conducted to evaluate a null hypothesis proposing that the observed  
330 count of data points in each partition was the result of expected proportions assigned to each  
331 of the partitions.

332

### 333 [Empirical Distribution](#)

334 Cognizant that the data came from disparate sources (organisms, populations, traits,  
335 experimental goals), it was not the intention to conduct a formal metaanalysis, but to simply  
336 visualize the general occupancy, tendency and dispersion of the phenotypic correlation,  
337 coheritability and coenvironmentability as scatter plot on the 3DHER-plane and 2DHER-field.  
338 Histograms were drawn to visualize the frequency and variability of the data.

339

## 340 Modeling the phenotypic correlation

341 Though it was not the aim of this work to create a predictive statistical model, it was  
342 nevertheless of interest to observe how  $r_{P_{x,y}}$ , as a scalar, dependent variable, related to either  
343  $(h_{x,y}, e_{x,y})$  or  $(r_{A_{x,y}}, r_{E_{x,y}})$  acting as regressors (or explanatory variables) in a multiple  
344 regression model. This exercise allowed also to check the relationship between regression  
345 parameters, and the consistency of regression equation using data as a whole and by partition.  
346 The models were:

$$347 \text{ Model 1: } r_{P_{x,y_i}} = \beta_{01} + \beta_{1h} \cdot h_{x,y_i} + \beta_{2e} \cdot e_{x,y_i} + \epsilon_{1i}$$

$$348 \text{ Model 2: } r_{P_{x,y_i}} = \beta_{02} + \beta_{1r} \cdot r_{A_{x,y_i}} + \beta_{2r} \cdot r_{E_{x,y_i}} + \epsilon_{2i}$$

349 where the parameters  $\beta_0$  is the intercept,  $\beta_1$  is the slope of the regression of phenotypic  
350 correlation  $r_{P_{x,y}}$  on the genetic factor, namely,  $h_{x,y}$  (model 1) or  $r_{A_{x,y}}$  (model 2), and  $\beta_2$  is the  
351 regression coefficient corresponding to the environmental factor,  $e_{x,y}$  (model 1), or  $r_{E_{x,y}}$  (model  
352 2). Model 1 assumes that given the data set  $\{r_{P_{x,y_i}}, h_{x,y_i}, e_{x,y_i}\}_{i=1}^n$  of  $n$  observations, a linear  
353 relationship exists between the dependent variable  $r_{P_{x,y}}$  and the bivariate vector of regressors  
354  $\{h_{x,y}, e_{x,y}\}$ . The  $\epsilon$  term was assumed to have a normal distribution with zero mean and  
355 constant variance  $\sigma_\epsilon^2$  (a path analytical representation of model 1 is presented in  
356 Supplementary Information section 3.2.2). A similar rationale applies to model 2. The results  
357 of the regression analyses using Model 1 were assessed based upon the expectations derived  
358 from equation [ 3 ] (i.e. zero intercept, and each has a slope parameter equal to positive one).

359 Model 2 was also expected to yield a zero intercept, and , if the genetic and environmental  
360 correlations are zero then the phenotypic correlations must also be zero. Otherwise, there are  
361 no theoretical relationship that relates  $r_{P_{x,y}}$  to  $r_{A_{x,y}}$  and  $r_{E_{x,y}}$  directly. The least-squares  
362 estimates of  $\beta_0$ ,  $\beta_1$  and  $\beta_2$  were estimated from the data using the PROC REG procedure of  
363 SAS, applied to the data set as a whole as well as by partition. The statistics collected from the  
364 results were the intercept ( $\beta_0$ ), slope ( $\beta_1$ ), and the R-square of each model.

365

### 366 Disparity Index Analyses

367 The disparity index ( $D$ ) is defined as the absolute value of the difference between the  
368 phenotypic correlation and the genetic correlation,  $D = |r_{P_{x,y}} - r_{A_{x,y}}|$  (Willis et al. 1991). This  
369 study used  $D$  for two purposes. One was as a means of validation (Supplementary Information  
370 Appendix 2). The second use was to evaluate the closeness of the magnitudes of  $r_{P_{x,y}}$  and  
371  $r_{A_{x,y}}$ . With the aim to further investigate the relationship between  $r_{P_{x,y}}$  and  $r_{A_{x,y}}$ , the disparity  
372 index was treated as a random variable, and for this purpose this work derived its probability  
373 density function, which used as a basis the transformation of the absolute difference of two  
374 uniform random variates, is formulated as  $f_D(D) = 2 - 2d$  for  $0 \leq D \leq 1$  (Supplementary  
375 Information 7.5.2). A method to generate simulated disparity data is presented in  
376 Supplementary Information section 7.5.3.

377

## 378 Illustrative Examples

379 Data from selected studies pertaining a range of topics of particular relevance to modern  
380 biology were used to help illustrate how the decomposition of  $r_{P_{x,y}}$  into  $h_{x,y}$  and  $e_{x,y}$   
381 becomes an appropriate and pertinent approach to postulate hypotheses concerning the  
382 degree of influence that shared genetics and common environmental factors have on shaping  
383 an observable association between traits.

384

## 385 Data availability

386  
387 Supplementary Material is deposited and available in FigShare <https://> . It  
388 contains File D1 Data consisting of the raw numerical values obtained from the literature  
389 review and examples, File SI Supplementary Information including text explaining mathematical  
390 and inferential statistical aspects, and additional text and figures; and the File C1 Computing  
391 containing code and resources used in statistical and mathematical calculations (SAS, MS Excel).

392

## 393 Results

394 This work analyzed more than 7700 observations comprising compiled data for the distribution,  
395 and examples, plus more than 16000 data points of the transcriptomics example . The data set  
396 compiled from journal articles amounted to  $n = 6287$  observations, and involved 140 studies  
397 in the areas of human genetics, agronomy, forestry, fisheries, animal husbandry, ecology , and  
398 life history research. Data was collected from humans ( $n = 1069$ ), animals ( $n = 3535$ , 39



399 genera, 40 species), plants ( $n = 1683$ , 26 genera, 33 species). Observations belonged to  
400 morphological (4288), physiological (1721), fitness-life history (20), and behavioral (258) traits.  
401 Around 60% of the studies were carried out under field conditions, and the rest in lab. The  
402 data collected consisted of heritabilities and correlations, and from them the coheritability and  
403 coenvironmentability corresponding to each observation, was derived including determination  
404 of the partition the datum belong to (see Theoretical Background section). The data set  
405 underwent an stringent validation procedure including detection and exclusion of outliers  
406 (Supplementary Information Appendix 2). Basic statistics for each variable ( $r_{P_{x,y}}$ ,  $r_{A_{x,y}}$ ,  $r_{E_{x,y}}$ ,  $h_{x,y}$   
407 and  $e_{x,y}$ ) are presented in Supplementary Information Appendix 3A.

408

#### 409 Distribution of the $h_{x,y}$ , $e_{x,y}$ , $r_{P_{x,y}}$ data

410 Given the heterogeneity of the data in terms of objects of study, traits, sources, methods,  
411 precision, it was not the intention to perform a formal metaanalysis, nor to combine data of the  
412 studies to create weighed averages. Rather, the objective here was to observed occurrence,  
413 tendency and variability of the data. Inspection of the coheritability and coenvironmentability  
414 data plotted on the 3DHER-plane (Figure 3A) or 2DHER-field (Figure 4A) shows it scattered on a  
415 two-dimensional object. The 3D plot of the phenotypic correlation as a function of the genetic  
416 and environmental correlations occupied a more variable volume (Figure 3B, 4B). The mean  
417 values of coheritability (0.075, SE 0.0039) and coenvironmentability (0.083, SE 0.0022) matched  
418 very well with the calculated overall mean phenotypic correlation (0.158, SE 0.0025). The  
419 variability, as measured by the standard deviation, was less for the coheritability (0.177) than

420 for the coenvironmentability (0.198) and phenotypic correlation (0.309). The standard error of  
421 the estimates was the lowest for coheritability (mostly found below 0.16) (for formulas see  
422 Supplementary Information section 3.3). The dispersion was not uniform, all the variables  
423 presented abundance around the origin, but became more infrequent towards the borders  
424 (Figure 4A) particularly at the neighborhood of the lines  $h_{x,y} - e_{x,y} = 1$  and  $h_{x,y} - e_{x,y} = -1$ .  
425 Overall, the tendency of the relationship of  $r_{P_{x,y}}$  with  $h_{x,y}$ ,  $e_{x,y}$ ,  $r_{A_{x,y}}$  and  $r_{E_{x,y}}$  was positive.

426

**A**

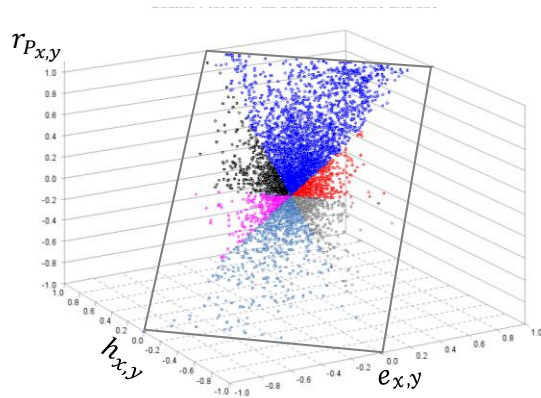

**B**

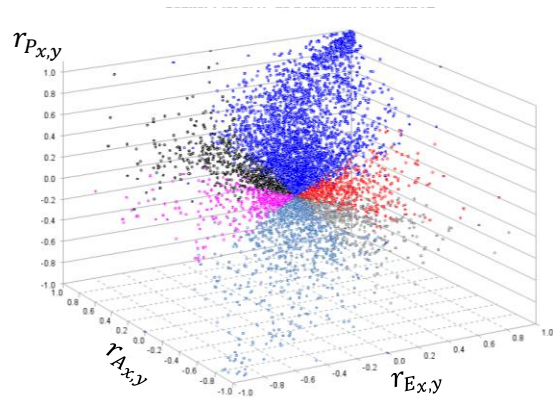

427

**C**

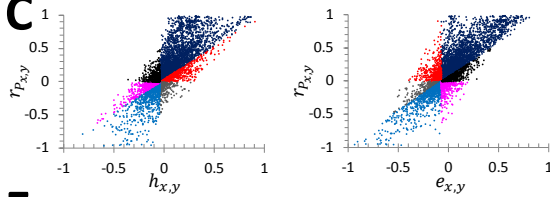

**D**

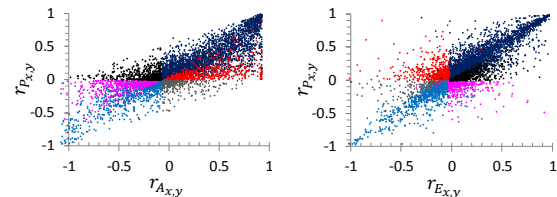

**E**

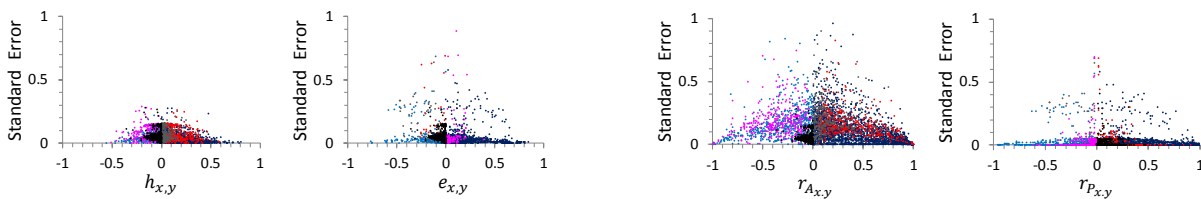

428

429 Figure 3. Three-dimensional scatter plot of the phenotypic correlation ( $r_{P_{x,y}}$ ) and the (A)  
430 coheritability  $h_{x,y}$ , coenvironmentability  $e_{x,y}$  on the 3DHER-plane; and (B) the genetic  
431 correlation  $r_{A_{x,y}}$  and the environmental correlation  $r_{E_{x,y}}$ . The bivariate plot of the phenotypic  
432 correlation against (C) the coheritability, and coenvironmentability, and against (D) the genetic  
433 and environmental correlations. (E) Standard errors of the parameters estimators. Total  
434 sample size  $n = 6287$ , color refers to each partition.

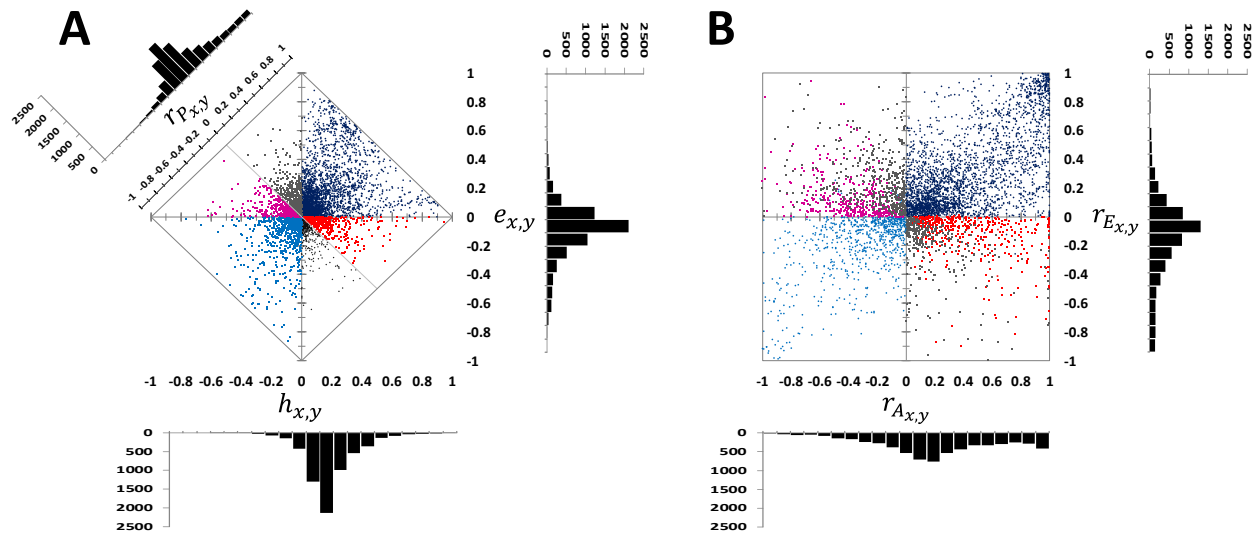

435

436 Figure 4: Two-dimensional scatter plot ( $n = 6287$ ) of (A) Coheritability, coenvironmentability,  
437 and phenotypic correlations and histograms of the compiled data displayed on the  
438  $h_{x,y} \cdot e_{x,y} \cdot r_{P_{x,y}}$  (2DHER)-field. (B) Plot of the genetic and environmental correlations, and  
439 histograms. All histograms exhibit a positively skew.

440

441 Inspection of the 2DHER-field showed, as expected, well demarcated division between the  
442 partitions (4A), a feature not apparent in the plot of the correlations which rather revealed a  
443 blurred distinction between partitions (4B). In the plot of the correlations, the data extends  
444 throughout its domain occupying most of the area. The histograms approximate a normal  
445 distribution, though the shape of all of them appeared somehow skewed towards the positive  
446 side.

447

## 448 **Multinomial Test**

449

450 The abundance of the data varied significantly by partition. Partition  $S_{+1}$  was the most  
451 populated ( $n_{S_{+1}} = 3312$ ) amounting to 53% of the data, which was followed by  $S_{-1}$   
452 ( $n_{S_{-1}} = 880$ , or 14.2%). The occupancy in partitions  $S_{+2}$  ( $n_{S_{+2}} = 617$ , 0.099%) and  $S_{-3}$   
453 ( $n_{S_{-3}} = 562$ , 0.09%) were approximately similar. The lowest count were found in partitions  $S_{-2}$   
454 ( $n_{S_{-2}} = 473$ , 0.076%) and  $S_{+3}$  ( $n_{S_{+3}} = 367$ , 0.059%). The count in partition  $S_0$  was 67 and was  
455 not considered in further calculations. Both the chi-square and the chi-LRT gave qualitatively  
456 similar results so here I present only the results obtained using the Chi-Square test. A  
457 goodness-of-fit test for multinomial distribution under the null hypothesis  $H_0: p_{S_{+1}} = 0.53$ ,  
458  $p_{S_{+2}} = 0.1$ ,  $p_{S_{+3}} = 0.06$ ,  $p_{S_{-1}} = 0.14$ ,  $p_{S_{-2}} = 0.07$ ,  $p_{S_{-3}} = 0.1$ , showed that the data fitted  
459 reasonably well the multinomial model ( $\chi^2_{6-1} = 9.348$ ,  $p = 0.096$ ) (Supplementary  
460 Information Appendix 6B).

461

## 462 **Multiple Regression Analysis**

463 The purpose of these analyses was to evaluate the consistency of model equations and  
464 parameters, generated from the use of the whole data set and by partition. The phenotypic  
465 correlation was modeled as a function of coheritability-coenvironmentability (Model 1), and  
466 genetic- environmental correlations (Model 2). Figure 5 presents the regression parameter  
467 estimates corresponding to the genetic factor ( $\beta_1$ ), the environmental factor ( $\beta_2$ ), and the R-  
468 square ( $R^2$ ) for each model. Model 1 showed complete consistency and uniformity ( $\beta_1 =$

469  $\beta_2 = 1; R^2 = 1$ ), as was clearly seen in producing the same linear regression equation  
470 regardless if the analysis used the whole data set or of each partitions. The ratio of slopes to in  
471 all cases maintained a 1-to-1 relationship. By Equation [3], the intercept was expected to be  
472 zero and the regression coefficients (slopes) of  $h_{x,y}$  and  $e_{x,y}$  each equaled to unity  
473 (Supplementary Information Appendix 3G), and the results from Model 1 satisfied these  
474 requirements. In Model 2, the relationship between the slopes of the genetic and  
475 environmental correlation varied widely (the test of heterogeneity of slopes shows that they  
476 are effectively different among each other, Supplementary Information Appendix 3G). The  
477 relationship  $\beta_1 r_{Ax,y} : \beta_2 r_{Ex,y}$ , was 1:1.45 (overall) whereas by partition, it oscillated from 1:-  
478 0.17 to 1:3.64. Partition  $S_{+2}$  and  $S_{-2}$  produced models with the lowest  $R$ -squares (0.299 for  
479  $S_{+2}$ , 0.235 for  $S_{-2}$ ). Analyses of residuals and the  $R$ -squares of Model 1 captured all of the  
480 variability of  $r_{P_{x,y}}$  ( $R^2 = 1$ ), in contrast Model 2 exhibited variable degrees in explaining the  
481 variability of  $r_{P_{x,y}}$ , from low to high  $R$ -squares (0.23 to 0.94), and each partition yielded a  
482 different linear equation.

483

484

485

486

**A**

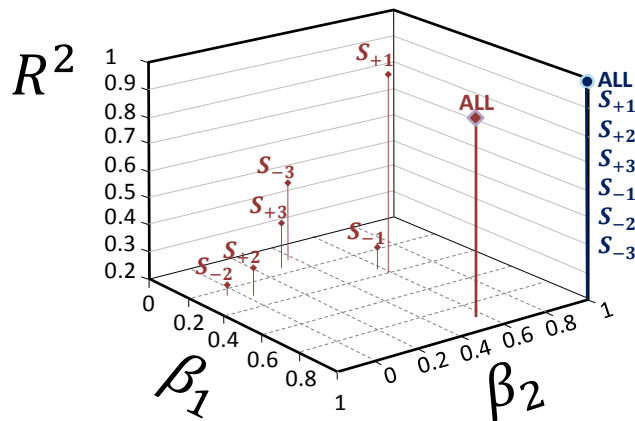

487

**B**

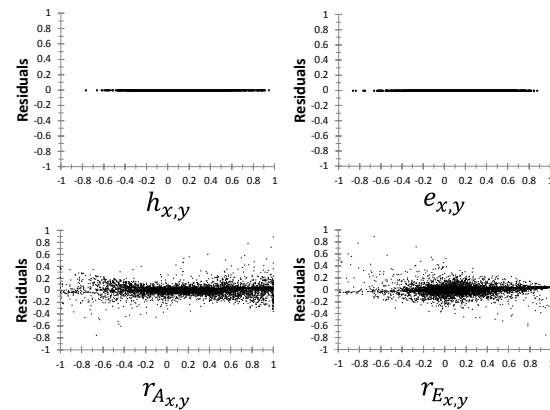

488 Figure 5. (A) Relationship of the multiple regression parameters ( $\beta_1$ ), slope ( $\beta_1$ ) for model 1  
 489 (blue needle with top circle) and Model 2 (brown needle with rhomboid top). Labels indicate  
 490 the whole data set (ALL) or the partition subsets. (B) Plots of residual against coheritability and  
 491 coenvironmentability (Model 1) display low variability dispersed around the horizontal axis  
 492 indicating that the linear regression model is appropriate for the data. Compare this to the  
 493 residual plots involving factors  $r_{A,x,y}$  and  $r_{E,x,y}$  of Model 2.

494

495 The results point out to the dependability of the coheritability and coenvironmentability as the  
 496 appropriate factors directly related to  $r_{P,x,y}$ , and the consistency of parameter estimates  
 497 obtained by Model 1 whether using the overall or partition data.

498

499

## 500 **Analyses on $r_{P_{x,y}}$ and $r_{A_{x,y}}$**

501

502 To address whether the phenotypic and genetic correlation exhibit some degree of similarity  
503 that would justify  $r_{P_{x,y}}$  to be an appropriate proxy for  $r_{A_{x,y}}$ , here I now compare the phenotypic  
504 and genetic correlation in terms of the Dissimilarity Index ( $D$ ), namely, the degree of departure  
505 of their numerical values. A correlation analysis of the overall data set showed that these two  
506 variables maintained a high statistical association ( $r = 0.821$ ,  $p < 0.0001$ ,  $n = 6288$ ). The  
507 regression of  $r_{A_{x,y}}$  on  $r_{P_{x,y}}$  had a slope of 1.14 (standard error 0.01, R-square 0.67,  
508 Supplementary Information Appendix 3F). Approximately 2% of the data had a dissimilarity  
509 equal to zero, indicating that  $r_{A_{x,y}} = r_{P_{x,y}}$ , and if a  $D \leq 0.03$  represents an acceptable level of  
510 similarity between  $r_{A_{x,y}}$  and  $r_{P_{x,y}}$ , it occurred in 13% of all comparisons. However, there was a  
511 considerable departure of their values at the individual level. The mean of the absolute  
512 disparity  $D$  index was 0.181 (standard deviation 0.175,  $n = 6288$ ) across all comparisons. In  
513 15% of the data,  $r_{P_{x,y}}$  and  $r_{A_{x,y}}$  differed in sign (partitions  $S_{-3}$  and  $S_{+3}$ ). **When both  $r_{A_{x,y}}$  and**  
514  **$r_{P_{x,y}}$  were positive ( $n = 3929$ ),  $r_{P_{x,y}}$  was, on average, 130% the magnitude of  $r_{A_{x,y}}$ . When both**  
515  **$r_{A_{x,y}}$  and  $r_{P_{x,y}}$  were negative ( $n = 1353$ ),  $r_{P_{x,y}}$  was 129% the magnitude of  $r_{A_{x,y}}$ .** The  
516 relationship  $r_{A_{x,y}} > r_{P_{x,y}}$  held in 58% ( $n = 3621$ ) of all pairwise comparisons, 70% of the which  
517 were in partition  $S_{+1}$ , and 100% in partitions  $S_{+2}$  and  $S_{+3}$ . Around 40% ( $n = 2526$ ) of the  
518 overall comparisons involved  $r_{A_{x,y}} < r_{P_{x,y}}$ , which was found in 67% of comparison in partition  
519  $S_{-1}$ , and 100% in partitions  $S_{-2}$  and  $S_{-3}$ . If the disparity between  $r_{P_{x,y}}$  and  $r_{A_{x,y}}$  were largely  
520 due to measurement error of the genetic correlation, then it would be expected that the



521 squared disparity ( $D^2$ ) would approach the sampling variance of  $r_{A_{x,y}}$ .  $D^2$  and the sampling  
522 variance of  $r_{A_{x,y}}$  had a correlation not different than zero ( $r = 0.17, p = 0.001$ ) indicating they  
523 were not strongly associated, and in 59% ( $n = 3353$ ) of the cases that reported standard errors  
524 of the genetic correlation,  $D^2$  displayed a value larger than the estimated sampling variance of  
525  $r_{A_{x,y}}$ . Under the null hypothesis  $H_0$ : the difference between the median of  $D^2$  and the median  
526 of  $\text{var}(r_{A_{x,y}}) = 0$ , versus  $H_1$ : median difference  $\neq 0$ , the Wilcoxon Rank Sum Test had a critical  
527 value 3138479, test statistic 11.65,  $p < 0.0001$ , shows that there is enough evidence to reject  
528  $H_0$  that the median of  $D^2$  and  $\text{var}(r_{A_{x,y}})$  are quite similar. In addition, the Kruskal-Wallis test  
529 rejected the null hypothesis that there is no difference among partitions in mean rank of either  
530  $D^2$  or the  $\text{Var}(r_{A_{x,y}})$ . (Supplementary Information Appendix 3I) . Therefore, differences  
531 between genetic and phenotypic correlations cannot be entirely explained by sampling error  
532 alone. The Disparity Index displayed its largest values when  $r_{P_{x,y}}$  was around zero, and  
533 progressively decreased as the  $r_{P_{x,y}}$  approached the limits of its domain (Figure 6A). The  
534 frequency distribution of the  $D$  values fitted a triangular model (Figure 6B, Supplementary  
535 Information 7.6). The relationship between  $r_{A_{x,y}}$  and  $r_{P_{x,y}}$  differed greatly by partition (Figure  
536 6). With the goal to evaluate the capacity of the phenotypic correlation to predict the value of  
537 the genetic correlation, the simple regression of  $r_{A_{x,y}}$  on  $r_{P_{x,y}}$  (Figure 6C) resulted in a model  
538 where  $r_{P_{x,y}}$  a low capacity to explain the variability of  $r_{A_{x,y}}$  (R-square 0.674) and a slope equal  
539 to 1.141 (SD 0.01,  $p < 0.0001$ , 95%CI [1.121,1.605], Supplementary Information Appendix 3F).  
540 Analyses by partition showed that the equations of the regression lines and the R-squares

541 varied widely. In 4 out of the 6 partitions the R-squares were below 0.3. The largest R-square  
 542 values were 0.73 ( $S_{+1}$ ) and 0.63 ( $S_{-1}$ ) which correspond to partitions where  $r_{A_{x,y}}$  on  $r_{P_{x,y}}$   
 543 shared the same sign. The lowest R-square were 0.005 ( $S_{+3}$ ) and 0.001 ( $S_{-3}$ ), corresponding  
 544 to partitions where both phenotypic and genetic correlations differed in sign.

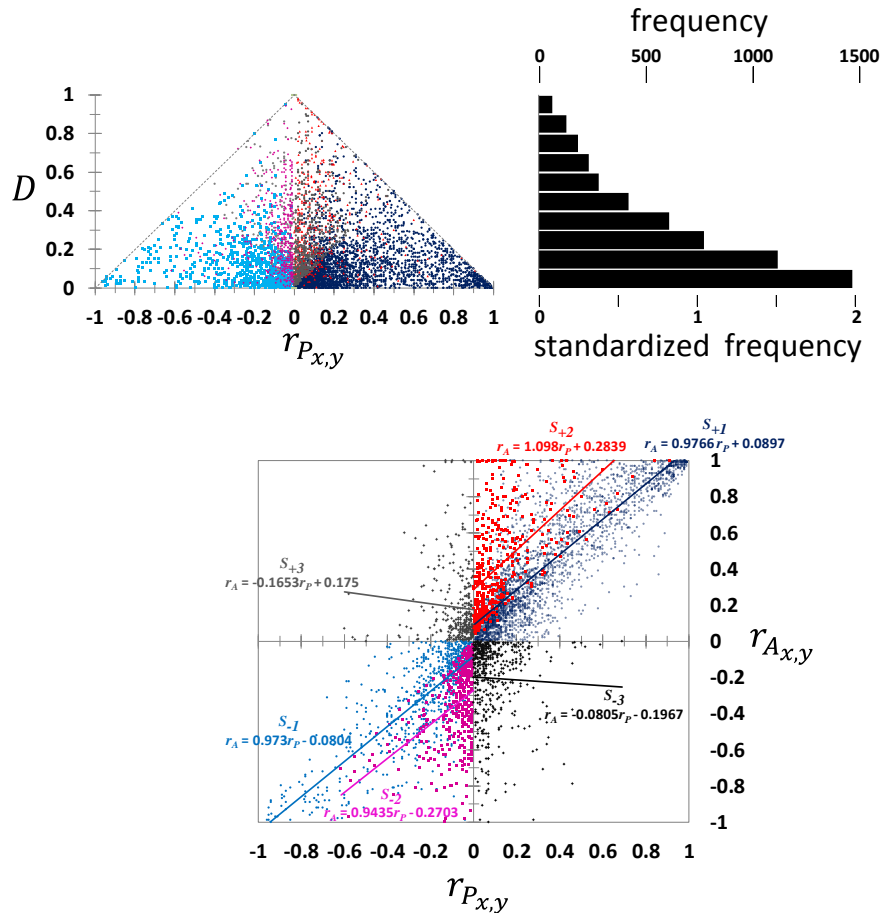

545  
 546 Figure 6. (A) Disparity Index  $D$  as a function of the phenotypic correlation value. Each dot  
 547 represents the absolute value of the difference between  $r_{A_{x,y}}$  and  $r_{P_{x,y}}$  ( $n = 6288$ ). (B)  
 548 Histograms reflecting the frequency of occurrences of comparisons with Disparity Index values  
 549 within specified ranges. (C) Summary graph of the simple regression between  $r_{A_{x,y}}$  (scalar

550 dependent variable) and  $r_{P_{x,y}}$  (explanatory variable) showing the model equation and the R-  
551 square.

552

### 553 [Illustrative Examples](#)

554 To illustrate the application of the decomposition of the phenotypic correlation into the  
555 coheritability and coenvironmentability, data from published articles were used to gain insight  
556 into relevant topics of modern biology. Further examples can be found in the Supplementary  
557 Information Appendix 3.

558

#### 559 **Example 1. Changes due to selection over generations**

560 Ramniwas et al. (2013) tested the hypothesis that abdominal melanisation in *Drosophila*  
561 *melanogaster* enhances desiccation resistance. They performed a series of upward and  
562 downward selections in the lab and reported the direct response in terms of abdominal  
563 coloration change ( $R_{\text{melanisation}}$ ) after five generations. In addition, correlated responses in  
564 several physiological traits related to water stress were also measured, including cuticular  
565 water loss ( $CR_{\text{cuticular\_water\_loss}}$ ). Figure 7 presents the results obtained from upward selection in  
566 female flies and the direct ( $R_{\text{melanization}}$ ) and correlated response ( $CR_{\text{cuticular\_water\_loss}}$ ) plotted  
567 against the selection differential ( $S_C$ ) for direct selection on melanisation. It can be seen that  
568 as the individuals were becoming darker, the cuticular water loss decreased concomitantly.  
569 Employing the regression slope of cumulative response against selection differential ( $S_C$ ) for

570 darker individuals, the realized heritability for cuticular melanisation was  $h_r^2 = 0.46$  ( $SE$  0.03).  
571 To determine the realized coheritability between melanisation (trait  $x$ ) and cuticular water loss  
572 (trait  $y$ ), a regression line was fitted having the correlated response of cuticular water loss as  
573 dependent variable against  $S_C$  as independent variable (Figure 7). The slope,  
574  $b = -0.2673$  ( $SE$  0.012,  $CI_{0.95} [-0.27, -0.22]$ ), represents half the coheritability of the traits  
575 ( $b = \frac{1}{2} h_{x,y}$ ) because only measurements obtained from female individuals were used.  
576 Therefore, the coheritability between melanisation and the rate of water loss was  $h_{x,y} r =$   
577  $-0.5346$  ( $SE$  0.024). This negative coheritability is in agreement with melanisation-  
578 desiccation hypothesis: darker individuals retain more water and are more resistant to  
579 desiccation.

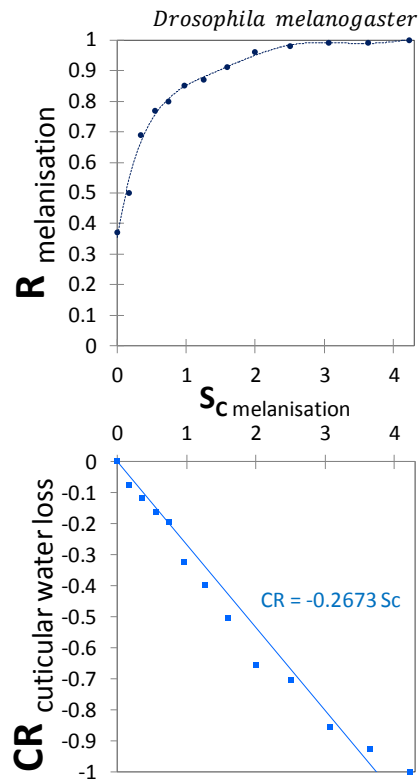

580

581 Figure 7. Direct response to melanization and the correlated response of the rate of cuticular  
582 water loss among female flies of *Drosophila melanogaster* (Source Ramniwas et al. 2013).

583

584 It is important to recognize, in a selection experiment, that each generation of selected parents  
585 constitutes a sample of the genetic correlation, and its value in successive generations of  
586 selection depend upon one another sequentially, therefore changes in the value of the genetic  
587 correlation will have some of the properties of a random walk (Gromko 1995), and manifest a  
588 large standard error.

589

## 590 **Example 2. Changes through development**

591 How do the contributions of shared genetics and shared environment affect the phenotypic  
592 correlation through development? Are the trajectories of the phenotypic correlation,  
593 coheritability and coenvironmentability informative about relationships between traits? Here I  
594 present the results derived from two field experiments. Diao et al. (2016) studied growth in  
595 Japanese larch (*Pinus kaempferi*) in order to evaluate the optimal age for early selection, an  
596 aspect particularly important for a long-term plantations. To this aim, the authors determined  
597 phenotypic and genetic parameters of absolute height measurements obtained in different  
598 ages and compared them to the one at age 16 (Figure 8A). All correlations (phenotypic, genetic  
599 and environmental) increased as the trees grew, the phenotypic correlation reached 10% of its  
600 maximum at age 11 and the genetic correlation around age 8. The coheritability and

601 coenvironmentability also gradually increased and reached 10% from its maximum at age 6,  
602 which reveals that no significant gain from selection can be achieved after this age, setting an  
603 age earlier than the one based on the genetic correlation.

604 Another example involved incremental weight gain rather than absolute measurements of  
605 weight of Korean native chickens subject to a common diet (Manjula et al. 2017). The aim of  
606 the study was to find the best age to make selections that would predict growth at age 20.  
607 Measurements of weight were obtained from a number of individuals and subject to a logistic  
608 growth model, whose parameters were also treated as traits. Data presented in Figure 8B uses  
609 data of 2-week weight increments and the  $\beta$  parameter of the logistic model that captures the  
610 asymptotic mature weight gain. The heritability of weight increment decreased consistently as  
611 the animals aged. The genetic correlation between the weight increment and the  $\beta$  parameter  
612 from early life up to age 8 were negative, and from age 12 to late in life were positive. The  
613 phenotypic correlation followed a trend similar to the trajectory of the coenvironmentability  
614 indicating that the association between these traits is mainly influenced by common  
615 environmental factors. To elucidate what led to changes in the trait-trait relationship between  
616 ages 8 and 12, going from negative early in life to positive values late in life, it would  
617 necessitate to inquire from other lines of evidence in the metabolic, physiological, and  
618 developmental areas. The coheritability had minimal contribution to the phenotypic  
619 correlation, and varied in very narrow range of low values (-0.2 to 0.1). One can conclude that  
620 weight gain can be better achieved through poultry rearing practices (e.g. diet, feeding regime)  
621 than through genetics.

622 Analyses of longitudinal data present challenges because repeated measures from the same  
623 subject are often (auto)correlated, and cannot be assumed to be independent, such is the case  
624 of growth traits especially when measurements in certain point in time contain the  
625 measurement previously obtained. It would benefit to use suitable and informative covariates  
626 to help adjust values. The stochastic trends of observations across age/development/time,  
627 shows that any measurement at only a single time point, may over- or underestimate the  
628 genetic and environmental contributions to the  $r_{P_{x,y}}$ .

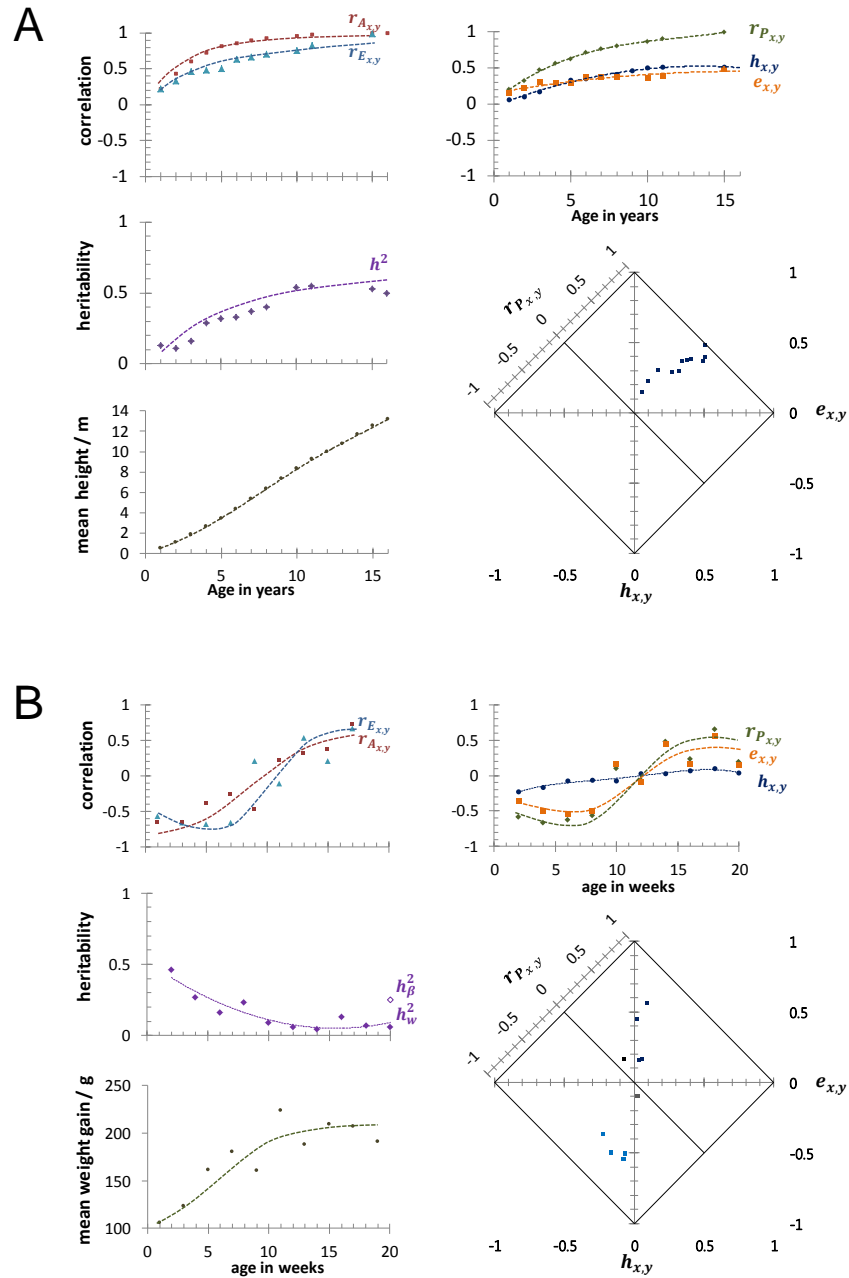

629

630 Figure 8. Age-dependent trend in genetic parameters in (A) height growth in Japanese larch

631 (*Larix kaempferi*) (Data source Diao et al. 2016), and (B) weight gain (increments) in Korean

632 native chicken (*Gallus gallus domesticus*) (Data source: Manjula et al. 2017).

633



### 634 **Example 3. Modularity and Integration**

635 The rationale of morphological integration states that functionally and developmentally related  
636 exhibit high levels of phenotypic correlation (Olson and Miller 1958), so that traits belonging to  
637 the same functional and/or developmental group are genetically more integrated than traits  
638 with different functions or developmental origins (Conner and Via 1993, Waitt and Levin 1998).  
639 Willmore et al. (2009) conducted a quantitative genetics study designed to compare patterns of  
640 mandibular integration between baboon and mouse. The traits were distances between  
641 homologous landmarks in the mandible of each species. Heritabilities of the traits as well as the  
642 correlations ( $r_{A_{x,y}}$ ,  $r_{P_{x,y}}$ ) between them were determined in each species separately. Three  
643 cases are presented here that reveals the degree of insight provided by the decomposition of  
644 the phenotypic correlation. The first case deals with two traits whose genetic correlations are  
645 higher than the phenotypic correlation in both species. In the incisive alveolar module, the  
646 correlations ( $r_{A_{x,y}}$ ,  $r_{P_{x,y}}$ ) between the distances *sms-idp* and *sms-idi* were (0.911, 0.838) in  
647 baboon, and (0.862, 0.567) in mouse (displayed as a triangle in the 2DHER-field, Figure 9),  
648 which by a simple examination of their magnitudes, it would suggest of a strong genetic  
649 influence. The use of the coheritability *and* coenvironmentability expand the inferential space,  
650 and point out that most of phenotypic correlation between these traits in baboon was due to  
651 the coenvironmentability (75% $r_P$  or 0.624), whereas in the mouse due to the coheritability  
652 (60% $r_{P_{x,y}}$  or 0.325). This aspect would otherwise have been overlooked by merely comparing  
653 the magnitudes of the correlations.

654 A second case involves trait-trait associations entirely due to either coheritability or  
 655 coenvironmentability. In both species the distances *ang-irb* (angular process) and *mmn-iar*  
 656 (coronoid process) are weakly correlated at the phenotypic level ( $r_{P_{x,y}}$ : in baboon 0.213, in  
 657 mouse 0.143; circle)(Figure 9A). However, in baboon the coheritability had a negligible  
 658 contribution to  $r_{P_{x,y}}$  ( $h_{x,y} = 0.03$ ,  $e_{x,y} = 0.183$ ), whereas in mouse the coheritability  
 659 amounted to most of the phenotypic correlation ( $h_{x,y} = 0.170$ ,  $e_{x,y} = -0.027$ ).  
 660 Lastly, this case exemplifies that trends in one species cannot be extrapolated to related ones.  
 661 The phenotypic correlation, coheritability and coenvironmentability in the alveolar *sms-idi* and  
 662 *sms-idp* (Figure 9A, triangle) and in the condylar *pmc-amc* and condylar-coronoid *pmc-mmn*;  
 663 (rhomboid) have similar values in baboon and they that plot almost together in the 2DHER-  
 664 field. In mouse, however, these traits differ in terms phenotypic correlations and the relative  
 665 amount contributed by the coheritability and coenvironmentability.

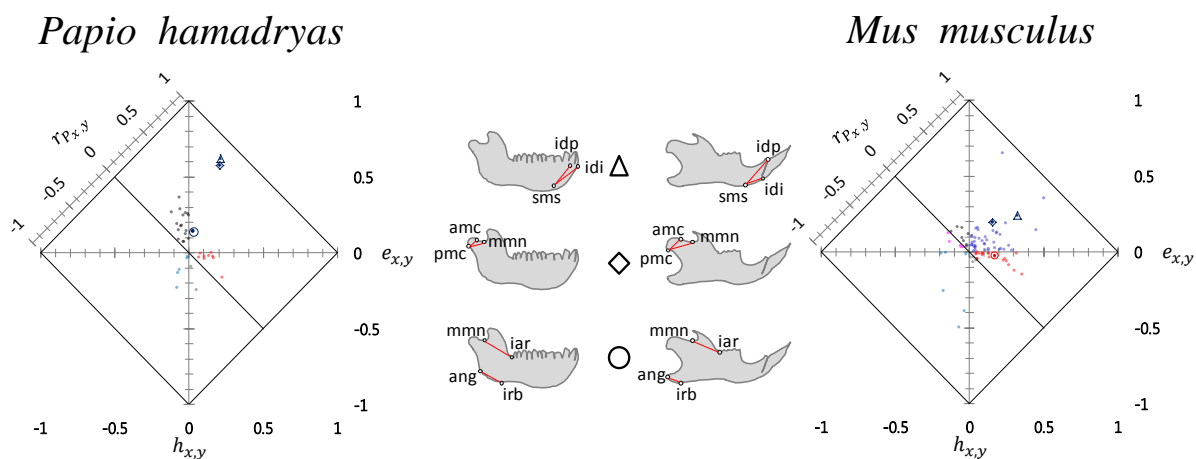

666

667 Figure 9. Modularity and integration. Comparison of mandibular integration between baboon  
668 (*Papio hamadryas*), and mouse (*Mus musculus*). At the center are depiction of the mandibles  
669 and the distance traits: triangle=*sms-idi* and *sms-idp*; rhomboid=*pmc-amc* and *pmc-mmn*;  
670 circle=*ang-irb* and *mmn-iar* (Data source: Willmore et al. 2009).

671

672 Without disregarding the high proportion of negative genetic correlations in the baboon  
673 (around 40%), the allometric data clearly indicates that there is a distinct pattern of modular  
674 development operating in the mandible of each species, which should be expected given their  
675 different ecological niche, feeding adaptations, mastication process, habits, and diet.

676

677

678

#### 679 **Example 4. Trade-offs of life history traits**

680 A fundamental tenet in the study of fitness in natural populations is that life-history traits limit  
681 the individual to attain simultaneously maximal growth, reproduction, and survival (Lande  
682 1982). A negative genetic correlations among life-history traits is often adduced to indicate a  
683 trade-off that constrain the correlated response to selection in natural populations (Stearns  
684 1989, Zera and Harshman 2001). Figure 10 presents results of coheritability and  
685 coenvironmentability among life-history traits. Knowing that the sign of the coheritability is

686 conferred by the genetic correlations, Figure 10 shows sufficient examples of life history traits  
687 relationships in both negative and positive directions, congruent with findings in other studies  
688 (Roff 1996, Kruuk 2003). Noteworthy is the study of Dutilleul et al. (2015) who analyzed fertility  
689 and survival of the nematode *Caenorhabditis elegans* subject to contaminated environments.  
690 They found that genotypes that achieve faster sexual maturity (early growth) were more fertile,  
691 but had a reduced life span. Their data shows that fertility ( $x$ ) and early growth ( $y$ ) were  
692 correlated at the phenotypic level  $r_{P_{x,y}} = 0.543$ , with approximately similar contributions by  
693 coheritability ( $h_{x,y} = 0.248$ ) and coenvironmentability ( $e_{x,y} = 0.295$ ). However, with late  
694 growth, fertility exhibited a negative phenotypic correlation  $r_{P_{x,y}} = -0.154$ , which was mostly  
695 due to the coheritability (96%  $r_{P_{x,y}}$  or  $-0.148$ ). The decrease of the phenotypic correlation  
696 between fertility from early to late growth could be explained by the antagonistic pleiotropy  
697 model which states that if the genes that promote fertility early in life are the same that cause  
698 deleterious effects late in life, then fitness is maximized for fertility when the organism is  
699 young, at the expense of detrimental performance as the individual age. It would be of great  
700 interest to explore whether the described trade-off results from a covariance of both traits to a  
701 third unmeasured trait, such as the individual's body size. If individuals reach maturity early at a  
702 relatively small adult size (implying shorter growth period) then it would have the added  
703 benefit to produce progeny early to compensate for their short lifespan (Charmantier et al.  
704 2006). Generally, traits associated to adaptive response resulting in enhanced fitness (e.g.  
705 fertility) will provide an advantage to the individuals that manifest such traits by favoring their  
706 reproduction, whose timing and plasticity would depend on the environment. Although

707 selection pressure will always tend towards fitness increase (Fisher 1930, p. 35), it does not  
708 imply that fitness necessarily cause the competitive ability of a population to be superior with  
709 respect to other populations not interbreeding with it (Lerner and Dempster 1948).

710

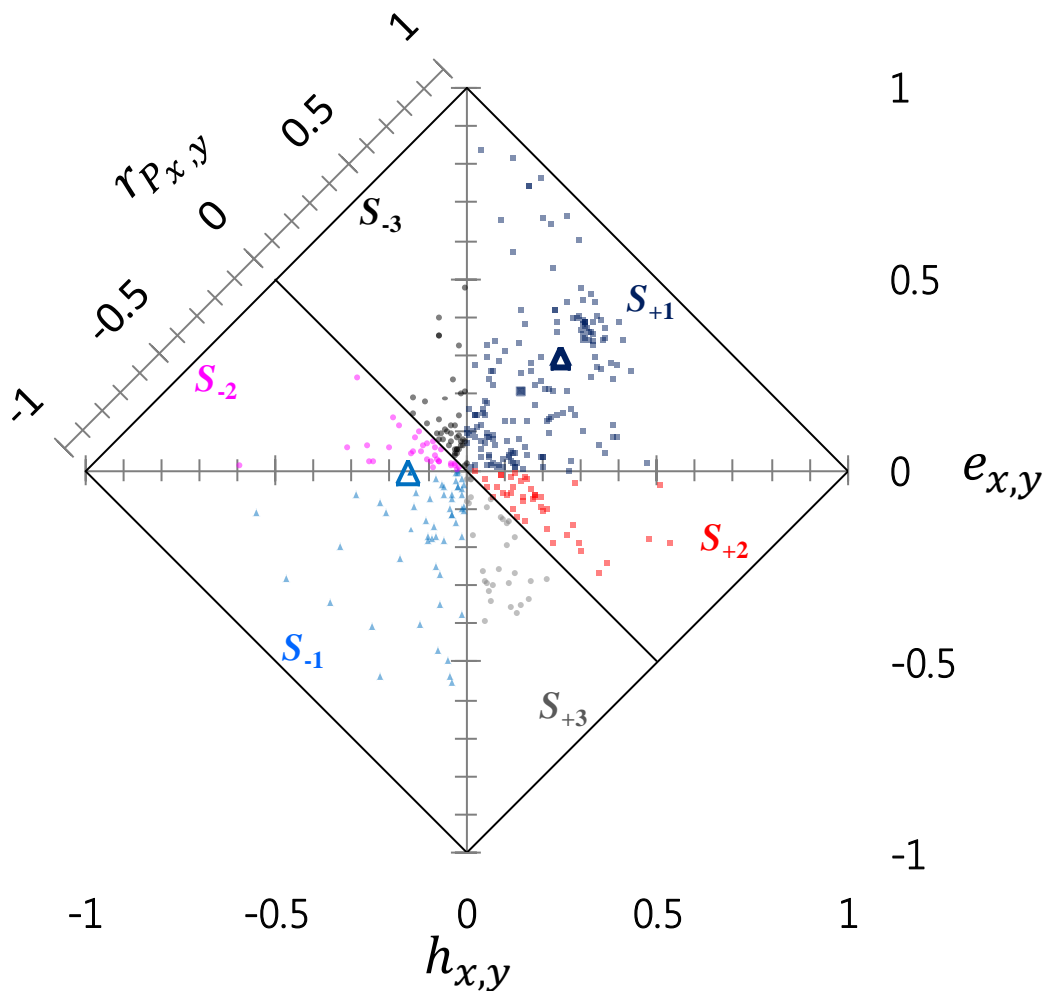

711

712 Figure 10. Trade-offs in life history traits in animals. Highlighted are the contrasting results of  
713 fertility and growth in *Caenorhabditis elegans* (Dutilleul et al. 2015). Potential trade-offs may

714 be present between fertility and early growth (triangle solid). Fertility and late growth (triangle  
715 clear). (Data source: compiled from the literature).

716

717 The visualization of phenotypic, genetic, *and* environmental information in the 2DHER-field  
718 does facilitate the analysis in a single graph. There is an increasing recognition that the  
719 environment has a direct influence on the quantitation of genetic parameters underlying life-  
720 history traits, therefore it adds value to use the completeness of the data in these analyses to  
721 evaluate changes in environmental conditions can influence genetic interactions and  
722 covariances among life-history traits (Sgrò and Hoffman 2004).

723

#### 724 **Example 5. Gene co-expression**

725 Gene expression is a major contributor to phenotypic co-variation in human complex trait  
726 (Gandal et al. 2018, Lee et al. 2012). Quantitative genetics of gene expression considers the  
727 abundance of a particular mRNA transcript as a “trait”. Gene expression can be influenced by a  
728 variety of biological factors, which are especially susceptible to interact with the environment.  
729 To gain insight into the mechanisms that control gene expression, Lukowski et al. (2017)  
730 investigated the proportion of co-expression between genes in whole blood samples. Figure 12  
731 displays the results of thousands ( $n \sim 14000$ ) of bivariate comparison in the 2DHER-field, and  
732 show that gene expression levels explore all sign configurations among  $r_{P_{x,y}}$ ,  $h_{x,y}$ , and  $e_{x,y}$ .  
733 Most remarkable is the apparent lack of data points along the transect  $-0.1 < h_{x,y} < 0.1$ ,

734 which distinctly separates and defines two major patterns of coexpression based on the sign of  
735 the coheritability. Though classification is not the focus of this work, the visualization in the  
736 2DHER-field nevertheless reveals a level of insight and could serve as a guide to further  
737 examine functional modes of co-expression.  
738

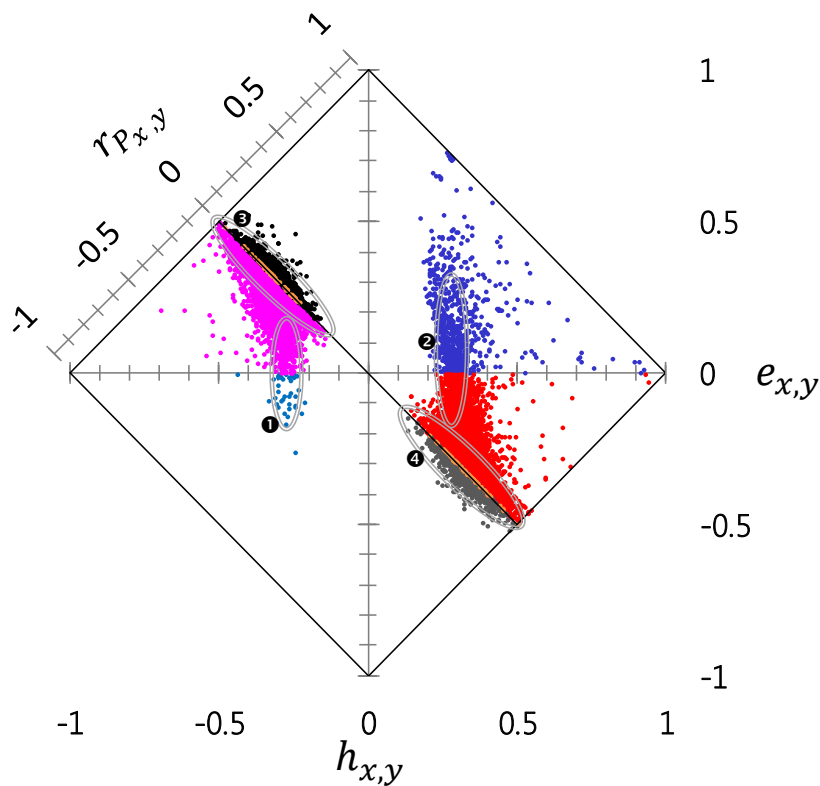

739

740 Figure 12. Shared genetic and shared environmental architecture of transcription in human  
741 peripheral blood. Significant genetically correlated probe pairs (study-wide false discovery rate  
742  $FDR < 0.05$ ). Of these 14991 data pairs, 14020 (93%) are located on different chromosomes,  
743 7886 have a positive coheritability and 7105 a negative coheritability (Data source: Lukowski  
744 et al. 2017).

745 Here special attention is placed on data points circumscribed by the ellipses in Figure 12.  
746 Groups 1 and 2 enclose observations with low coheritability, delimited to the interval  
747  $-0.3 < h_{x,y} < -0.2$  (Group 1), and  $0.2 < h_{x,y} < 0.3$  (Group 2). In these groups, much of the  
748 phenotypic correlation is under varying influence of the coenvironmentability. In Group 1 the  
749 phenotypic correlations are negative, mostly occupying partition  $S_{-2}$ . The positive phenotypic  
750 correlations associated to Group 2, includes data with negative (partition  $S_{+2}$ ) and positive  
751 (partition  $S_{+1}$ ) coenvironmentabilities. Group 3 and 4 are found along a narrow interval around  
752 the null phenotypic correlations ( $-0.1 < r_{P_{x,y}} < 0.1$ ). For the  $r_{P_{x,y}}$  to be close to zero, the  
753 coheritability and coenvironmentability must have similar magnitudes but with different sign.  
754 Numerous instances where the phenotypic and genetic correlation differed in sign were found  
755 in partitions  $S_{+3}$  and  $S_{-3}$ . The values of the genetic correlation averaged  $-0.019$  and oscillated  
756 widely throughout all its domain  $[-1, 1]$  as can be seen by the large standard deviation (SD)  
757  $0.883$ , a fact that is corroborated by the large disparity values (mean  $D = 0.84, SD = 0.12$ ).  
758 The coheritability allocated more or less equally to the positive and negative realms of its  
759 domain. All this indicated that the genetic correlation when the phenotypic correlation was  
760 close to or not different than zero differed greatly in magnitude and direction with respect to  
761  $r_{P_{x,y}}$ . When sample sizes are large relative to the number of variables, the graphical method is  
762 likely to provide the most insight. Gene expression is subject to many factors including  
763 methodological bias (see Pereira et al. 2009), and is known to be responsive to environmental  
764 clues that alter mRNA abundances accordingly (Grishkevich and Yanai 2013). Therefore, it



765 would be of great interest to conduct assessments of loci known to be up- or down regulated  
766 under different environmental conditions (Li and Burmeister 2005).

## 767 Discussion

768

769 Biological studies rely on the phenotypic correlation between traits as an important  
770 measurement of association between the phenotypic values of two traits. There is an added  
771 interest to distinguish how much of the correlation can be attributed to additive genetics and  
772 how much to the environment. This paper presents a method that captures both the genetic  
773 and environmental contributions to the phenotypic correlation, based on quantitative genetics  
774 theory, and aims to formalize the decomposition of the phenotypic correlation into the  
775 coheritability and coenvironmentability, to further present its mathematical and statistical  
776 properties, and to provide a visualization tool capable to handle all the pertinent variables (i.e.,  
777  $r_{P_{x,y}}, h_{x,y}, e_{x,y}$ ) concurrently.

778

## 779 Coheritability and genetic correlation

780

781 First, it is important to distinguish between coheritability and genetic correlation. Coheritability  
782 quantifies the contribution of additive genetic effects to the phenotypic correlation between  
783 two traits, and relates the genetic covariance to the bivariate phenotypic variability (i.e.  
784 geometric mean of the phenotypic variances, see Equation [4]). The genetic correlation

785 measures the association between the breeding values of two traits and relates the genetic  
786 covariance to the bivariate *genetic* variability (i.e. geometric mean of the genetic variances,  
787 equation [6]). Thus, coheritability and genetic correlation do not share the same inferential  
788 space. Coheritability, together with the coenvironmentability have an additive relationship with  
789 the phenotypic correlation, and is therefore most proximal to the phenotypic correlation, an  
790 aspect not shared by the genetic and environmental correlation. In addition, the coheritability  
791 has predictive ability in regard to correlated response to selection. The formula of the  
792 coheritability (Equation 7) involves the modulation of the genetic correlation by the square root  
793 of the trait heritabilities, the latter being independent random variables, coheritability and  
794 genetic correlation, notwithstanding sharing the same sign, are not numerically similar nor  
795 follow necessarily the same trend nor rank.

796

### 797 **The biological and the biometrical concepts of coheritability**

798

799 To further conceptualize the meaning of coheritability, it is useful to construe the term in a  
800 biological sense as well as in a biometrical sense. Biological coheritability is grounded on a  
801 gene-centric approach that rests on the degree of correspondence between specific phenotypic  
802 traits and the allelic content of identified, causal genes influencing them. This includes the  
803 effect of all loci that affect both traits (i.e. pleiotropic alleles), and the effects of non-randomly-  
804 associated, tightly linked loci acting on each trait singly (i.e. loci in linkage disequilibrium) (see  
805 Zhang et al. 2018, Tyler et al. 2009), as well as the loci that regulate their expression. Trait

806 correlations caused by pleiotropic alleles are adaptive, different than trait correlations due to  
807 linkage disequilibrium, which could erode through recombination (Saltz et al. 2017).

808 The biometric concept of coheritability is based on population-level, statistical principles, and it  
809 recognizes that the observed association of traits is the net realization of a multiplicity of  
810 shared and not shared genetic factors influencing polygenic traits. It expresses the notion that  
811 two traits are inherited together (i.e. maintain the resemblance seen in the parental  
812 generation) due to the aggregate additive effect of genetic factors affecting the traits, including  
813 those acting on each trait individually, others on both traits. In this sense, the biometrical  
814 coheritability derived from multivariate analysis becomes a hypothesis on the degree of  
815 contribution of genetics to the phenotypic correlation of traits.

816 Biological coheritability deals with the genetic architecture of quantitative traits based upon  
817 identified causal gene variants, quantitative trait loci, additive and dominance effects, mapping,  
818 coding and noncoding sequences, and by understanding its variability due to the action of  
819 modifier genes adjusting its penetrance and expressivity, the occurrence of recombination  
820 events, or by the activity of regulatory elements in other parts of the genome (Short et al. 2018,  
821 Mackay et al. 2009). Discerning between pleiotropic and coincident linkage is an area of  
822 intensive experimental (Wagner and Zhang 2011, Solovieff et al. 2013, Gardner and Latta  
823 2007) effort associated to a diversity statistical and computational (Hackinger and Zeggini  
824 2017, Schaid et al. 2016, Han and Pouget 2015, Yang et al. 2015, Carter et al. 2007) approaches  
825 involving sequencing, fine mapping, and functional characterization of the gene and gene  
826 product (Flint and Mackay 2009). The multifunctionality of a pleiotropic gene can be mediated

827 by alternative splicing, by RNA editing, and tissue specific expressions. Pleiotropy can also  
828 exhibit multiple phenotypic consequences of a single molecular function, such as those acting  
829 on multiple pathways (Singh and Shaw 2012).

830 The biometrical coheritability invokes quantitative genetic concepts such as heritability,  
831 correlation (genetic, phenotypic), genetic factors. Its variability depends on population  
832 structure, the additive and phenotypic variances of each trait, and the genetic covariance  
833 between the traits (Carey 1988). The biometrical concept of coheritability does not carry the  
834 assumption that the genetic factors involved in the expression of the traits are related to genes  
835 with an additive mode of action, nor the existence of genetic covariance precludes the effects  
836 of genes with any degree of dominance or epistasis (cf. Huang and Mackay 2016).

837 Biometrical coheritability is not commensurate with relevance of importance of the trait-trait  
838 association. In a recent study on the relationship between amygdala (trait  $x$ ) and emotion  
839 recognition (trait  $y$ ), Knowles et al. (2015) determined heritabilities ( $h_x^2 = 0.72, h_y^2 = 0.32$ ) and  
840 genetic correlation ( $r_{A_{x,y}} = 0.25$ ) of these traits. It allows us to determine a coheritability  
841  $h_{x,y} = 0.12$ , which appears to be of very low magnitude. Using bivariate linkage and  
842 association analyses, they identified the gene *PDE5A* (locus 4q26) whose gene product is the  
843 phosphodiesterase 5 (PDE5) enzyme expressed in various regions of the brain, and has been  
844 linked to deficits in memory recognition. As such the PDE5 enzyme has emerged as a potential  
845 drug target for treating cognitive deficits and neurological disease (Teich et al. 2016).

846 Whereas biological coheritability relates allelic variants and traits, biometrical coheritability  
847 focuses on trait-trait associations. At the interface is the extensive use of molecular markers  
848 (e.g. SNPs) in genome analyses which has occasionally presented loci harboring markers  
849 associated to several, sometimes disparate, traits. These cross-phenotype associations could  
850 have as underlying cause pleiotropy, linkage disequilibrium, or be artifactual nature (Solovieff  
851 et al. 2013). Besides the ‘missing’ heritability problem that arises in the estimation of  
852 heritability in GWAS (Yang et al. 2017), Gianola et al. (2015) demonstrated that correlation  
853 coefficients inferred using markers can provide a distorted picture of the actual genetic  
854 correlation between traits due to the lack of knowledge about linkage disequilibrium  
855 relationships between QTLs and markers. Thus, speculating about genetic correlations and even  
856 more about its causes (e.g. pleiotropy) using genomic data is conjectural (cf. Lee et al. 2012).  
857 Pleiotropy is, by definition, a property of a gene or locus, not of a marker. Therefore, caution  
858 must be exercised when interpreting (rethorically and conceptually) findings of marker-based  
859 genetic parameters, as to distinctly differentiate the causal (i.e., genes) component from the  
860 instrument (i.e., the marker). This distinction is critical.

861

### 862 **Coheritability under a null phenotypic correlation**

863

864 A phenotypic correlation equal to or not significantly different than zero, does not necessarily  
865 imply that both coheritability and coenvironmentability are also zero or non-significant. The  
866 coheritability and coenvironmentability could be similar in magnitude but not in sign.

867 Therefore, an apparent lack of association between traits at the phenotypic level, cannot be  
868 dismissed as being of no interest at the genetic level. Disparity analyses revealed that  $r_{P_{x,y}}$  and  
869  $r_{A_{x,y}}$  differed the most when the phenotypic correlation is around zero.

870 Under a null phenotypic correlation, the definition and metrics of the phenotypes must be  
871 reassessed. The ability to define meaningful traits in appropriate continuous or categorical  
872 scales would help avoid the confounding of distinct characters as a single phenotype (de  
873 Villemereuil 2017). This is of particular important in clinical research where a convergence of  
874 multiple traits, symptoms, signs in an individual may be a consequence of a cascade of disease  
875 causing defects in a complex network of interacting genes, proteins, and metabolites (Park et  
876 al. 2009, Emilsson et al. 2018). Yet given the heterogeneity of sources contributing to  
877 comorbidity, it is not obvious whether these traits are properties of a disease at the individual  
878 or at the population level. Among several options, two approaches can be used to address this  
879 problem. One approach is the use of subphenotype groups. A subphenotype is a subset of  
880 individuals drawn from a large cohort who feature a specific set of traits in common (Morris et  
881 al. 2010). The intent is to ‘concentrate’ individuals with similar trait-trait associations, generally  
882 using latent class analyses (Famous et al. 2017, Gårdlund et al. 2018), under the premise that, if  
883 the traits have a common genetic basis, their detection would be facilitated, otherwise by  
884 ascertaining all individuals simultaneously as having the same phenotype, the causal factors  
885 would be overlooked.

886 Another approach regards a complex phenotype as a composite of many traits, some of them  
887 more closely connected to the genetic cause of the complex phenotype. A trait with this

888 characteristic is referred to as an endophenotype. Endophenotypes are widely employed in  
889 psychiatric genetics (Iacono 2018, Doyle et al 2005), livestock research (te Pas et al. 2017),  
890 immunology (Gregersen et al. 2015), and clinical research (Benyamin et al. 2007). Glahn (et al.  
891 2012) used the absolute value of the coheritability as a criterion to select endophenotypes  
892 associated to major depression risk. Similarly, Hammer et al. (2006) proposed to dissect  
893 complex phenotypes into traits spanning different levels of biological organization within the  
894 individual in order to characterize the full suite of factors that contribute to quantitative  
895 variation across cellular, tissue, organ, organismal levels, as well as developmental stages (Cobb  
896 et al. 2013). Sun et al (2015) proposed a method to search for a combination of phenotypic  
897 characters of multivariate phenotypes and directly maximize the heritability of this combined  
898 trait. Though the aim of these models is to enhance the detection of trait-trait associations, it  
899 also brings ontogeny as a main factor shaping relationships among traits.

900

## 901 **Rules governing trait-trait associations**

902

903 Inspection of the scatter plot of  $h_{x,y}$ ,  $e_{x,y}$  and  $r_p$  on the 3DHER-plane graphically showed that,  
904 despite the sizeable sample size, not all places in the plane appeared uniformly populated,  
905 suggesting that some areas more inaccessible than others such as close to the border where  
906 the relationship  $|h_{x,y} - e_{x,y}| = 1$  holds. At this area, data can only be generated by combining  
907 heritabilities and genetic correlations both at very high magnitudes. If the construction of traits  
908 entails optimization constraints, then heritabilities and genetic correlation reaching

909 simultaneously extreme values in their domains will not be favored. The occupancy question  
910 should be better viewed as a consequences of how traits are constructed, and how ontogeny  
911 molds their relationship through life. The organized, sequential, and modulating events of  
912 development would manifest varying degrees of genetic and environmental control of two  
913 correlated traits (Badyaev and Martin 2000, Saltz et al. 2017). Under this condition, not all  
914 corners of the 2DHER-field would be accessible to the same degree.

915 The developmental process by which traits are constructed derive from genetic (Kellogg 2004)  
916 and epigenetic interactions (Peaston and Whitelaw 2006), as well as its interactions with the  
917 environment, all combined to shape the phenotypes as emergent products of such interactions.  
918 Certainly, phenotypic structures can be mathematical modeled using simple rules (e.g. egg  
919 shape by Stoddard et al. 2017, shell coiling by Raup 1966), or conform to empirical allometric  
920 scaling such as volume and surface area (Square-Cube Law; Haldane 1926), metabolic rate and  
921 body size (Kleiber's Law; Niklas and Klutchera 2015, Hulbert 2014), speed and body mass  
922 (Meyer-Vernet and Rospans 2015). Though a constructionist perspective enhances our ability  
923 to account for the relationships among traits, these studies are not meant to simulate the  
924 actual biological mechanism of development. Developmental systems are often under strong  
925 stabilizing selection to maintain homeostasis, such that patterns of trait-trait covariation  
926 through ontogeny or within a particular ontogenic stage generally exhibit conservatism of  
927 developmental systems (Badyaev and Martin 2000). Genetic, phenotypic correlations and  
928 autocorrelations among traits would reduce independent variation of traits at different ages,  
929 limit the number of dimensions in growth trajectories, and overall present a powerful



930 inducement for maintaining certain relationships between traits through ontogeny (Badyaev  
931 and Martin 2000).

932

### 933 **The biotic environment and its role in trait-trait association**

934

935 The manner the coheritability undergoes changes under varying environmental circumstances  
936 reveal that the environment can potentially induce changes in the genetic architecture of  
937 complex traits (Sikkink et al. 2017), and inferences deduced from studies conducted in one  
938 environment cannot be generalized (Aastveit and Aastveit 1993). Stearns et al. (1991)  
939 proposed that environmentally induced changes in magnitude and sign of genetic covariances  
940 occur when traits are functionally uncoupled at the physiological or developmental levels.

941 Of particular importance is the need to clarify the extent, if any, of the existence of a  
942 covariance between the genetic effects of one trait and the environmental effects of the other.  
943 Generally, these terms are surmised to be zero. Nevertheless, instances of indirect genetic  
944 effects (IGEs, Bijma 2014) exerted by an individual on the trait values of another individual (e.g.  
945 maternal effects), admits that there may exist a partly heritable component in the social/biotic  
946 environment when IGEs occur (Ørsted et al. 2017). For instance, in isogenic lines of  
947 *Caenorhabditis elegans* nematodes, progeny traits such as fecundity and rate of development  
948 are due to maternal-dependent provisioning of vitellogenin protein to the embryos (Perez et al.  
949 2017), parents' influence juvenile body size by adjusting investment per offspring (Rollinson and

950 Rowe 2015). Traits related to growth, nutrient assimilation, and nourishment of an organism,  
951 which are generally assumed to be an intrinsic property of an individual, is directly affected by  
952 the microbiome that colonizes alimentary tracts of animals (Org et al. 2017), or the rhizosphere  
953 (Nihorimbere et al. 2011, Wissuwa et al. 2009) and phyllosphere (Kembel et al. 2014, Rosado et  
954 al 2018) of plants. The microbial diversity present, in turn, is influenced by host traits (Li et al.  
955 2018). Some researchers regard the commensal microbiome as a virtual organ of the body  
956 (Valdes et al 2018) whose genome brings forth emergent, novel capabilities (e.g. processing of  
957 drugs, resistance to toxins) to the host that would not otherwise exists (Kho and Lal 2018).  
958 Associations among traits manifested in an individual are not only the result from their own  
959 adaptations but also could derive from community level relationships. Grab et al. (2019) found  
960 that closely related pollinator bee species shared many behavioral and morphological traits  
961 including body size, plant fidelity, and visitation rate, but not flower-handling ability. On this  
962 basis, they were able to predict characteristics of fruit shape malformation from loss of  
963 diversity and abundance of pollinator bees in apple plants, and that phylogenetic diversity and  
964 species richness best predicted fruit weight and number of seeds per fruit.

965

966 **The coheritability and coenvironmentability are the most proximal factors affecting**  
967 **the phenotypic correlation**

968

969 The coheritability and coenvironmentability are the most proximal factors influencing  
970 additively the value of the phenotypic correlation. There is a tendency to surmise that the

971 genetic correlation *per se* will have a preponderant influence on the phenotypic correlation  
972 merely because its magnitude is sufficiently large. The theoretical and experimental examples  
973 presented in this paper make such proposition untenable. Equation [5] shows that the genetic  
974 correlation is embedded within the expression of the phenotypic correlation, where the  
975 magnitude of the genetic correlation is modulated by random variables, namely the trait  
976 heritabilities. Two traits may display high heritability values, yet be poorly correlated at the  
977 genetic level. Highly genetically correlated traits may each display low heritabilities (Drobnik  
978 and Cichoń 2016). Therefore, the coheritability is not a linear transformation of the genetic  
979 correlation (i.e. it does not preserve rank). A given value of the coheritability may be the result  
980 of a numerous set of heritability and genetic correlation values, the coheritability is not a  
981 monotonic transformation of the genetic correlation because the variables do not possess a  
982 one-to-one relationship. This nuanced interpretation of Equation [5] must be contrasted with  
983 other views that treat heritabilities as scalars (cf. Cheverud 1988). Therefore the simple  
984 comparison of  $r_{P_{x,y}}$  and  $r_{A_{x,y}}$  (or their matrices) cannot presume to convey information on the  
985 degree on which shared genetics influences  $r_{P_{x,y}}$ . The argument presented here is persuasive  
986 for three reasons. First, the phenotypic correlation and coheritability share the same common  
987 denominator, a fact that distinguishes them from the genetic correlation, therefore comparison  
988 of  $r_{P_{x,y}}$  and  $h_{x,y}$  is made on the same basis. Second, the partition of the phenotypic  
989 correlation into coheritability and coenvironmentability directly follows, in a standardized form,  
990 from the partition of the phenotypic covariance into genetic and environmental covariance ,  
991 maintaining additivity of the terms. That is a property that  $r_{A_{x,y}}$  and  $r_{E_{x,y}}$  do not have with  $r_{P_{x,y}}$

992 since their denominators involve different and independent random variables. Third, results of  
993 the regression analyses involving  $r_{A_{x,y}}$  and  $r_{E_{x,y}}$  as regressors failed to produce a general  
994 relationship that can hold to any data set.

995 Differing from this approach that compares  $r_{A_{x,y}}$  and  $r_{P_{x,y}}$  values in their own right, Cheverud  
996 (1988) postulated that phenotypic correlations could be used as a proxy for genetic  
997 correlations. The regression analyses presented in this study have shown that genetic  
998 correlation do not map directly to the phenotypic correlation, and overlooking genetic  
999 information (i.e.  $r_{A_{x,y}}$ ) can qualitatively affect inferences (evolutionary, statistical, practical  
1000 breeding outcomes) in ways a purely phenotypic approach cannot predict or explain (Rubin  
1001 2016, Kruuk et al. 2008). Therefore, correspondences between phenotypic-based predictions  
1002 on genetic outcomes are not robust for all plausible assumptions regarding the underlying  
1003 genetics of traits (Hadfield et al. 2007). By observing equation [5], to consider  $r_{P_{x,y}}$  as a  
1004 suitable predictor of  $r_{A_{x,y}}$  assumes that the phenotypic and genetic covariances possess the  
1005 same sign, that the phenotypic covariance is entirely genetic in nature (i.e. no detectable  
1006 environmental covariance is present), and that the heritabilities of both traits are unity, all  
1007 becoming very demanding assumptions (Supplementary Information section 7.4). Thus,  
1008 phenotypic data is not an adequate predictor of underlying genetics of natural or breeding  
1009 populations. Since both genetic and environmental correlations combine together to give the  
1010 phenotypic correlation, therefore, as Falconer and MacKay (1996, page 314) stated, 'this dual  
1011 nature makes it clear that the magnitude and even the sign of the genetic correlation cannot  
1012 be determined from the phenotypic correlation alone'.

1013

1014

1015 **Uses of the decomposition of the phenotypic correlations**

1016

1017 Besides the applications presented in the illustrative examples of this work, there are further  
1018 uses of the coheritability and coenvironmentability. These parameters could be utilized as  
1019 objective means to construct common-cause classification of diseases that cluster together  
1020 diseases with genetic and environmental similarities under the premise that shared genetics  
1021 and environment would manifest similarities between diseases that have a common-cause  
1022 nosology (Wang et al 2017). A promising application is enhancing the capability to recognize  
1023 biomarkers and traits that are readily impacted by a disease challenge (Boulton et al. 2018, de  
1024 Matos et al. 2018). Clinical diagnostics if construed as a type of indirect selection would benefit  
1025 by helping detect measurable traits (i.e. phenotypic characters, biomarkers) that are both  
1026 easily accessible, (positively or negatively) correlated with disease traits, and coheritable with it  
1027 (see Yin et al. 2017, Mehr et al. 2018, Ngo et al, 2018; cf. Bastaranche et al. 2018).

1028 Also, in the area of genomic prediction, knowledge on the degree genetic effects contribute to  
1029 the phenotypic correlation can be utilized to simultaneously improve prediction accuracy of  
1030 parameter estimates of breeding values of multiple traits (Crossa et al. 2017, Montesinos-Lopez  
1031 et al. 2018). Another area where the decomposition of the phenotypic correlation would be

1032 particularly useful is in high-throughput phenotyping. It would exploit the data in their full  
1033 capacity including the genetic interdependencies of traits (Xavier et al. 2017, Sun et al. 2017).  
1034 The coheritability of somatic, homologous traits common to both sexes would bring insight in  
1035 the study of sexually dimorphic species especially in the manner males and females respond to  
1036 selection in different directions given the tendency towards gender-optimal phenotypes (Mank  
1037 2009, Poissant et al. 2009, Chippindale et al. 2001). Application of the decomposition of the  
1038 phenotypic correlation in morphometrics, a tool for the quantitative description and statistical  
1039 analysis of morphology, could allow to model phenotypic changes between traits, emphasizing  
1040 those trait-trait correlations that have strong, underlying genetic component, and decrease bias  
1041 in certain direction of the morphospace (Polly 2008).

1042 Climate change studies rely on models that attempt to translate meteorological data into a  
1043 plausible biological response. Recent progress in modeling tree mortality under drought has led  
1044 to the incorporation of plant hydraulic traits in the parameterization of simulation models in  
1045 homogeneous forest communities (Choat et al. 2018, Martínez-Vilalta et al. 2009). The  
1046 coinheritance of these traits with other morphological, physiological and life-history traits  
1047 would add value to statements of climate change on trait diversity in natural habitats.

1048

1049

1050 **Conclusions**

1051

1052 The decomposition of the phenotypic correlation into coheritability and coenvironmentability is  
1053 consistent with classical statistical genetics theory and therefore placed on a firm statistical  
1054 footing. The decomposition provides interpretable results that employs the totality of the data  
1055 (phenotypic, genetic, environmental), utilizes univariate (heritabilities) and bivariate  
1056 (correlations) statistical measures, accounts for all combinations of magnitude and direction,  
1057 standardizes covariance terms to a common denominator, all integrated into a simple, intuitive  
1058 yet robust framework to simultaneously inform on portions of  $r_p$  contributed to joint genetic  
1059 effects and joint environmental deviations. The graphical representations of  $h_{x,y}$ ,  $e_{x,y}$ , and  $r_p$   
1060 in the 3DHER-plane or 2DHER-field help visualize all pertinent variables concurrently.

1061 Improving our knowledge of underlying genetic basis of trait-trait associations helps to  
1062 understand and predict species responses in a more variable environment. Although the  
1063 coheritability and coenvironmentability, in a biometric sense, *per se* cannot capture subtleties  
1064 of the causal factors underlying the genotypes or even their complete functional relationships  
1065 between them, it nevertheless explore an important inferential space that point to  
1066 relationships that deserve further scrutiny, refine searches, and in general, to supplement  
1067 results obtained from other experimental lines of evidence.

1068

1069

1070

1071

1072

1073

1074 **Literature Cited**

1075

1076 [ 000 ] Aastveit, A.H. and K. Aastveit, 1993 Effects of genotype-environments interactions on  
1077 genetic correlations. *Theor. Appl. Genet.* 86:1007-1013.

1078 <https://doi.org/10.1007/BF00211054>

1079 [ 000 ] Badyaev, A., and T.E. Martin, 2000 Individual variation in growth trajectories:  
1080 phenotypic and genetic correlations in ontogeny of the house finch (*Carpodacus*  
1081 *mexicanus*). *J. Evol. Biol.* 13: 290-301.

1082 <https://doi.org/10.1046/j.1420-9101.2000.00172.x>

1083 [ 000 ] Barabási, A.L. N. Gulbahce, and J. Loscalzo, 2011 Network medicine: a network-based  
1084 approach to human disease. *Nature Review Genetics* 12:56-68.

1085 <http://doi.org/10.1038/nrg2918>

1086 [ 000 ] Baradat, P., 1976 Use of juvenile-mature relationships and information from relatives  
1087 in combined multitrait selection. *Proc. Joint Meeting on Advanced Generation*  
1088 *Breeding.* June 14-18, Bordeaux, France. P. 121-138.

1089 [ 000 ] Bastarache, L., J.J. Hughey, S. Hebring et al. 2018 Phenotype risk scores identify  
1090 patients with unrecognized mendelian disease patterns. *Science* 359:1233-1239.

1091 <https://doi.org/10.1126/science.aal4043>



- 1092 [ 000 ] Beddard, P.R., C.S. Hsu, L.P.S. Spangelo et al. 1971 Genetic, phenotypic and  
1093 environmental correlations among 28 fruit and plant characters in the cultivated  
1094 strawberry. *Ca. J. Genet. Cytol.* 13:470-479. <https://doi.org/10.1139/g71-071>
- 1095 [ 000 ] Benyamin, B., T. I. A. Sørensen, K. Schousboe, M. Fenger & P. M. Visscher & K. O.  
1096 Kyvik 2007. Are there common genetic and environmental factors behind the  
1097 endophenotypes associated with the metabolic syndrome? *.Diabetologia* 50:1880–  
1098 1888. <https://doi.org/10.1007/s00125-007-0758-1>
- 1099 [ ] Bijma P. 2014. The quantitative genetics of indirect genetic effects: a selective review  
1100 of modelling issues. *Heredity* (2014) 112, 61–69.  
1101 <https://doi.org/10.1038/hdy.2013.15>
- 1102 [ 000 ] Boulton, K. M.J. Nolan, Z. Wu et al., 2018. Phenotypic and genetic variation in the  
1103 response of chickens to *Eimeria tenella* induced coccidiosis. *Genet. Sel. Evol.* 50:63.  
1104 <https://doi.org/10.1186/s12711-018-0433-7>
- 1105 [ 14 ] Carey, G. 1988. Inference about genetic correlations. *Behavior Genetics* 18(3):329-  
1106 338. <https://doi.org/10.1007/BF01260933>
- 1107 [ 000 ] Carter, G.W., S. Prinz, C. Neou et al. 2007 Prediction of phenotype and gene  
1108 expression for combinations of mutations. *Mol. Syst. Biol.* 3:96.  
1109 <https://doi.org/10.1038/msb4100137>
- 1110 [ 000 ] Charmantier A., C. Perrins, R.H. McCleery, B.C. Sheldon, 2006 Quantitative genetics of  
1111 age at reproduction in wild swans: support for antagonistic pleiotropy models of  
1112 senescence. *PNAS* 103:6587-6592. <https://doi.org/10.1073/pnas.0511123103>

- 1113 [ 000 ] Chen, X., B. Hawkins, C.-Y Xie, , C.C. Ying, 2004 Age trends in genetic parameters and  
1114 early selection of lodgepole pine provenances with particular reference to the  
1115 Lambeth model. *Forest Genetics*. 10. 249-258.
- 1116 [ 000 ] Cheng, R., J. Borevitz, R.W. Doerge, 2013. Selecting informative traits for multivariate  
1117 quantitative trait locus mapping helps to gain optimal power. *Genetics* 195:683-691.  
1118 <https://doi.org/10.1534/genetics.113.155937>
- 1119 [ 000 ] Cheverud, J.M. 1998. A Comparison of Genetic and Phenotypic Correlations.  
1120 *Evolution* 42(5):958-968. <https://doi.org/10.1111/j.1558-5646.1988.tb02514.x>
- 1121 [ 000 ] Chippindale A.K., J.R. Gibson, W.R. Rice 2001 Negative genetic correlation for adult  
1122 fitness between sexes reveals ontogenetic conflict in *Drosophila*. *PNAS*98: 1671–  
1123 1675. <https://doi.org/10.1073/pnas.98.4.1671>
- 1124 [ 000 ] Choat, B., T.J. Brodribb, C.R. Brodersen et al., 2018 Triggers of tree mortality under  
1125 drought. *Nature* 558:531-539. <https://doi.org/10.1038/s41586-018-0240-x>
- 1126 [ 000 ] Cobb, J.N., G. DeClerk, A. Greenberg et al., 2013 Next generation phenotyping:  
1127 requirements and strategies for enhancing our understanding of genotype-phenotype  
1128 relationships and its relevance to crop improvement. *Theor. Appl. Genet.* 126:867-887  
1129 <https://doi.org/10.1016/j.tplants.2017.08.011>
- 1130 [ 000 ] Conner, J., and S. Via. 1992. Natural selection on body size in *Tribolium*: possible  
1131 genetic constraints on adaptive evolution. *Heredity* 69:73–83.

- 1132 [ 000 ] Conner J.K., K. Karoly, C. Stewart, et al. 2011 Rapid independent trait evolution  
1133 despite a strong pleiotropic genetic correlation. *Am. Nat.* 2011 178:429-41.  
1134 <https://doi.org/10.1086/661907>
- 1135 [ 000 ] Crossa, J., P. Perez-Rodriguez, J. Cuevas 2017. Genomic selection in plant breeding:  
1136 methods, models, and perspectives. *Trends in Plant Sciences* 22: 961-975.  
1137 <https://doi.org/10.1016/j.tplants.2017.08.011>
- 1138 [ 000 ] DeStephano, A., Seshadri, S., Beiser, A., Atwood, L.D., Massaro, J.M., Au, R., Wolf,  
1139 P.A., DeCarli, C. 2009. Bivariate Heritability of Total and Regional Brain Volumes: The  
1140 Framingham Study. *Alzheimer Disease & Associated Disorders*. 23(3):218-223.  
1141 <https://doi.org/10.1097/WAD.0b013e31819cadd8>
- 1142 [ 000 ] de Matos, R., C. Ferreira, S.K. Herukka, et al., 2018 Quantitative genetics validates  
1143 previous genetic variants and identifies novel genetic players influencing Alzheimer's  
1144 disease cerebrospinal fluid biomarkers. *J. Alzheimer's Dis.* 66: 639-652.  
1145 <https://doi.org/10.3233/JAD-180512>
- 1146 [ 000 ] de Reggi, C. 1972 [Generalization of the notion of heritability of several characters:  
1147 coheritability]. *Ann. Genet.* 15:41-4.
- 1148 [ 000 ] de Villmereuil, P. 2017 Quantitative genetic methods depending on the nature of the  
1149 phenotypic trait. *The Year in Evolutionary Biology 2017. Annals of the New York*  
1150 *Academy of Sciences.* <https://doi.org/10.1111/nyas.13571>
- 1151 [ 000 ] Diao, S., Hou, Y., Xie, Y., and Sun, X. 2016. Age trends of genetic parameters, early  
1152 selection and family by site interactions for growth traits in *Larix kaempferi* open-

- 1153            **pollinated families. BMC Genetics 17:104. [https://doi.org/ 10.1186/s12863-016-](https://doi.org/10.1186/s12863-016-0400-7)**
- 1154            **0400-7**
- 1155    **[ 000 ] Doyle, A.E., E.G. Willcut, L.J. Seidman, et al., 2005 Attention-Deficit/Hypesensitivity**
- 1156            **Disorder endophenotypes. Biol Psychiatry 57:1324-1335.**
- 1157            **<https://doi.org/10.1016/j.biopsych.2005.03.015>**
- 1158    **[ 000 ] Drobniak, S. M. and Cichon, M. 2016. No evidence for the positive relationship**
- 1159            **between genetic correlations and heritabilities. bioRxiv**
- 1160            **<https://doi.org/10.1101/039388>**
- 1161    **[ 000 ] Dutilleul M., B. Goussen B, J.-M. Bonzom, S.Galas, D. Réale 2015 Pollution Breaks**
- 1162            **Down the Genetic Architecture of Life History Traits in *Caenorhabditis elegans*. PLoS**
- 1163            **ONE 10(2): e0116214.doi:10.1371/journal.pone.0116214**
- 1164    **[ 000 ] Emilsson, V. , and M. Ilkov, J.R. Lamb et al. 2018 Co-regulatory networks of human**
- 1165            **serum proteins link genetics to disease. Science 361769-773.**
- 1166            **<https://doi.org/a0.1126/science.aaq1327>**
- 1167    **[ 000 ] Falconer, D. S. and T. F. C. Mackay 1996. *Introduction to quantitative Genetics* Ed 4.**
- 1168            **Longmans Green, Harlow, Essex, UK. P. 312-334.**
- 1169    **[ 000 ] Famous, K.R., K. Delucchi, L.B. Ware et al., 2017 Acuate respiratory distress syndrome**
- 1170            **subphenotypes respond differently to randomized fluid management strategy. Am. J.**
- 1171            **Crit. Care Med. 195:331-338. <https://doi.org/10.1164/rccm.201603-0645OC>**

- 1172 [ 000 ] Fisher, R. A., 1915 Frequency distribution of the values of the correlation coefficient in  
1173 samples of an indefinitely large population. *Biometrika*, 10, 507-521.  
1174 <https://doi.org/10.1093/biomet/10.4.507>
- 1175 [ 000 ] Fisher, R.A., 1930 Fundamental Theorem of Natural Selection. *Trans. R. Soc.*  
1176 *Edinburgh* 52, 399–433.
- 1177 [ 000 ] Flint, J. and T.F.C. MacKay 2009 Genetic architecture of quantitative traits in mice,  
1178 flies and humans. *Genome Research* 19:723-733.  
1179 <https://doi.org/10.1101/gr.086660.108>
- 1180 [ 000 ] Gandal, M.J., J.R. Haney, N.N. Parikshak et al. 2018 Shared molecular neuropathology  
1181 across major psychiatric disorders parallels polygenic overlap. *Science* 359:693-697.  
1182 <https://doi.org/10.1126/science.aad6469>
- 1183 [ 000 ] Gårdlund, B., N.O. Dmietrieva, C.F. Pieper et al., 2018 Six subphenotypes in septic  
1184 shock: latent class analysis of the PROWESS Shock Study. *J. Crit. Care* 47:70-79.  
1185 <https://doi.org/10.1016/j.jcrc.2018.06.012>
- 1186 [ 000 ] Gardner, K.M. and R.G. Latta 2007 Shared quantitative trait loci underlying the  
1187 genetic correlation between continuous traits. *Molecular Ecology* 16:4195-4209.  
1188 <https://doi.org/10.1111/j.1365-294x.2007.03499.x>
- 1189 [ 000 ] Gianola, D., G. Campos, M.A. Toro, M.A. et al. 2015. Do Molecular Markers Inform  
1190 About Pleiotropy? *Genetics* 201:23–29. <https://doi.org/10.1534/genetics.115.179978>

- 1191 [ 000 ] Glahn D.C., J.E. Curran, A.M. Winkler, M.A. Carless et al. 2012 High Dimensional  
1192 Endophenotype Ranking in the Search for Major Depression Risk Genes. *Biological*  
1193 *Psychiatry* 71(1)6–14. <https://doi.org/10.1016/j.biopsych.2011.08.022>
- 1194 [ 000 ] Grab, H., M.G. Bramstetter, N. Amon et al. 2019 Agriculturally dominated landscapes  
1195 reduce bee phylogenetic diversity and pollination services. *Science* 363:282-284.  
1196 <https://doi.org/10.1126/science.aat6016>
- 1197 [ 000 ] Gregersen, P.K., G. Klein, M. Keogh et al., 2015 The Genotype and Phenotype  
1198 Registry: a living biobank for the analysis of quantitative traits. *Immunol. Res.* 63.107-  
1199 112. <https://doi.org/10.1007/s12026-015-8711-8>.
- 1200 [ 000 ] Grishkevich V. and I. Yanai 2013 The genomic determinants of genotype ×  
1201 environment interactions in gene expression. *Trends Genet.* 29:479-87.  
1202 <https://doi.org/10.1016/j.tig.2013.05.006>
- 1203 [ 000 ] Gromko, M.H. 1995 Unpredictability of correlated response to selection. Pleiotropy  
1204 and sampling interact. *Evolution.* 1995 Aug;49(4):685-693.  
1205 <https://doi.org/10.1111/j.1558-5646.1995.tb02305.x>
- 1206 [ 000 ] Gui, H., J. S. Kwan, P. C. Sham, S. S. Cherny and M. Li 2017. Sharing of Genes and  
1207 Pathways Across Complex Phenotypes: A Multilevel Genome-Wide Analysis. *Genetics*  
1208 206:1601-1609. <https://doi.org/10.1534/genetics.116.198150>

- 1209 [ 000 ] Guo, Z., Wang,W., Cai, T.T., Li, H. 2006. Optimal Estimation of Co-heritability in High-  
1210 dimensional Linear Models. arXiv:1605.07244
- 1211 [ 000 ] Hackinger, S. and E. Zeggini 2017 Statistical methods to detect pleiotropy in human  
1212 complex traits. Open Biol. 7:170125. <https://doi.org/10.1098/rsob.170125>
- 1213 [ 000 ] Hadfield, J.D., Nutall, A., Ososrio, D., Owens, I.P.F. 2006. Testing the phenotypic  
1214 gambit: phenotypic, genetic and environmental correlations of colour. Journal of  
1215 Evolutionary Biology 20:549–557. <https://doi.org/10.1111/j.1420-9101.2006.01262.x>
- 1216 [ 000] Haldane, J.B.S. 1926. On being the right size. Harper’s Magazine (March 1926).
- 1217 [ 000] Hammer G, Cooper M, Tardieu F, Welch S, Walsh B, van Eeuwijk F, Chapman S, Podlich  
1218 D. 2006. Models for navigating biological complexity in breeding improved crop  
1219 plants. Trends Plant Sci. 2006 Dec;11(12):587-93. Epub 2006 Nov 7.  
1220 <https://doi.org/10.1016/j.tplants.2006.10.006>
- 1221 [ 000 ] Han, B., J.G. Pouget, K. Slowikowski et al. 2015. Using genotype data to distinguish  
1222 pleiotropy from heterogeneity: deciphering coheritability in autoimmune and  
1223 neuropsychiatric diseases. bioRxiv online Nov. 6, 2015; doi:  
1224 <http://dx.doi.org/10.1101/030783>
- 1225 [ 000 ] Hazel, L.N. 1943 The Genetic Basis for Constructing Selection Indexes. Genetics 28:  
1226 476–490.

- 1227 [ 000 ] Höblinger, A., C. Erdmann, C.P. Strassburg, et al. 2009 Coinheritance of hereditary  
1228 spherocytosis and reversibility of cirrhosis in a young female patient with hereditary  
1229 hemochromatosis Eur. J. Med. Res. . 14: 182–184. [https://doi.org/10.1186/2047-](https://doi.org/10.1186/2047-783X-14-4-182)  
1230 [783X-14-4-182](https://doi.org/10.1186/2047-783X-14-4-182)
- 1231 [ 000 ] Hoskens, H., J. Li, K. Indencleef et al. 2018 Spatially dense 3D facial heritability and  
1232 modules of co-heritability in a father-offspring design. Front. Genet 9:554.  
1233 <https://doi.org/10.3389/fgene.2018.00554>
- 1234 [ 000 ] Hotelling, H. (1953) New light on the correlation coefficient and its transforms. J. Roy.  
1235 Statist. Soc. Ser. B, 15:193- 225.
- 1236 [ 000 ] Huang W. and Mackay T.F.C. 2016 The genetic architecture of quantitative traits  
1237 cannot be inferred from variance component analysis. PLoS Genet 12(11): e1006421.  
1238 <https://doi.org/10.1371/journal.pgen.1006421>
- 1239 [ 000 ] Hulbert, A.J. 2014. A skepti’s view: “Kleiber’s Law” or the “3/4 Rule” is neither a law  
1240 nor a rule but rather an empirical approximation. Systems 2:186-202.  
1241 <https://doi.org/10.3390/systems2020186>.
- 1242 [ 000 ] Iacono, W.G. 2018. Endophenotypes in psychiatric disease: prospects and challenges.  
1243 Genome medicine 10:11. <https://doi.org/10.1186/s13073-018-0526-5>



- 1244 [ 000 ] Janssens, M.J.J. 1979 Co-heritability: its relation to correlated response, linkage, and  
1245 pleiotropy in cases of polygenic inheritance. *Euphytica* 28:601-608.  
1246 <https://doi.org/10.1007/BF00038926>
- 1247 [ 000 ] Jia, Y., and J.L. Jannick 2012 Multiple-trait genomic selection methods increase  
1248 genetic value prediction accuracy. *Genetics* 192:1513-1522.  
1249 <https://doi.org/10.1534/genetics.112.144246>
- 1250 [ 000 ] Kellogg, E.A. 2004 Evolution of developmental traits. *Curr. Opin. Plant. Biol.* 7:92-98.  
1251 <https://doi.org/10.1016/j.pbi.2003.11.004>
- 1252 [ 000 ] Kembel, S. W., T. K. O'Connor, H. K. Arnold, et al. 2014 Relationships between  
1253 phyllosphere bacterial communities and plant functional traits in a neotropical forest.  
1254 *PNAS* 111:13715-13720. <https://doi.org/10.1073/pnas.1216057111>
- 1255 [ 000 ] Kho, Z.Y. and S. K. Lal, 2018 The Human Gut Microbiome – A Potential Controller of  
1256 Wellness and Disease. *Front. Microbiol.*  
1257 9:1835. <https://doi.org/10.3389/fmicb.2018.01835>
- 1258 [ 000 ] Knowles, E.E.M., D.R. McKay, J.W. Kent et al. 2015 Pleiotropic locus for emotion  
1259 recognition and amygdala volume identified using univariate and bivariate linkage.  
1260 *Am. J. Psychiatry* 172:190-199. <https://doi.org/10.1176/appi.ajp.2014.14030311>

- 1261 [ 000 ] Kruuk, L.E.B. 2003 Estimating genetic parameters in natural populations using the  
1262 animal model. *Phil. Trans. R. Soc. Lond. B* 359:873-890.  
1263 <https://doi.org/10.1098/rstb.2003.1437>
- 1264 [ 000 ] Kruuk, L.E.B., J. Slate, A.J. Wilson 2008 New Answers for Old Questions: The  
1265 Evolutionary Quantitative Genetics of Wild Animal Populations. *Annual Review of*  
1266 *Ecology, Evolution, and Systematics* 39:525-548.  
1267 <https://doi.org/10.1146/annurev.ecolsys.39.110707.173542>
- 1268 [ 000 ] Lande, R. 1982 A quantitative genetic theory of life history evolution. *Ecology* 63:607-  
1269 615. <https://doi.org/10.2307/1936778>
- 1270 [ 000 ] Lander, E.S. and N.J. Schork 1994 Genetic dissection of complex traits. *Science*  
1271 265:2037-2048. <https://doi.org/10.1126/science.8091226>
- 1272 [ 000 ] Lee, S.H. ,Yang, J.,Goddard, M.E., Visscher, P.M., Wray, N.R. 2012. Estimation of  
1273 pleiotropy between complex diseases using single-nucleotide polymorphism-derived  
1274 genomic relationships and restricted maximum likelihood. *Bioinformatics*  
1275 *Applications Note* 28(19)2540–2542. doi:10.1093/bioinformatics/bts474.
- 1276 [ 000 ] Lerner, I.M. 1950 *Population Genetics and Animal Improvement*. Cambridge  
1277 University Press. P. 97, 233.

- 1278 [ 000 ] Lerner, I.M. and E.R. Demspster 1948 Some aspects of evolutionary theory in the light  
1279 of recent work on animal breeding. *Evolution* 2:19-28.  
1280 <https://doi.org/10.1111/j.15585646.1948.tb02728.x>
- 1281 [ 000 ] Li, J. and Burmeister, M., 2005 Genetical genomics: combining genetics with gene  
1282 expression analysis. *Human Molecular Genetics* 14: R163–R169  
1283 <https://doi.org/10.1093/hmg/ddi267>
- 1284 [ 000 ] Li, Y., X. Wu, T. Chen et al., 2018 Plant phenotypic traits eventually shape its  
1285 microbiota: a common garden test. *Front. Microbiol.* 9:2479.  
1286 <https://doi.org/10.3389/fmicb.2018.02479>
- 1287 [ 000 ] Lukowski, S.W., Lloyd-Jones, L.R., Holloway, A. 2017. Genetic correlations reveal the  
1288 shared genetic architecture of transcription in human peripheral blood. *Nature*  
1289 *Communications* 8: 483. <https://doi.org/10.1038/s41467-017-00473-z>
- 1290 [ 000 ] Mackay, T.F.C., Stone, E.A., Ayroles, J.F. 2009. The genetics of quantitative traits:  
1291 challenges and prospects. *Nat. Rev. Genet*, 10:565-577.  
1292 <https://doi.org/10.1038/nrg2612>
- 1293 [ 000 ] Martinez-Villalta, J., H. Cochard, M. Mencuccini et al. 2009 Hydraulic adjustments of  
1294 Scots pine across Europe. *New Phytol.* 184:353-364. [https://doi.org/10.1111/j.1469-](https://doi.org/10.1111/j.1469-8137.2009.02954.x)  
1295 [8137.2009.02954.x](https://doi.org/10.1111/j.1469-8137.2009.02954.x)

- 1296 [ 000 ] Manjula,P., Park,H.-B.,Seo, D. Choi,N., Jin, S., Ahn,S.J., Heo,K.N., Kang,B.S., Lee,J.H.  
1297 2018. Estimation of heritability and genetic correlation of body weight gain and  
1298 growth curve parameters in Korean native chicken. *Asian-Australas J Anim Sci.*31(1):  
1299 26–31. <https://doi.org/10.5713/ajas.17.0179>
- 1300 [ 000 ] Mank, J.E. 2009 Sex chromosomes and the evolution of sexual dimorphisms: lessons  
1301 from the genome. *Am. Nat.* 173:141-150. [https://doi.org/10.1111/j.1558-](https://doi.org/10.1111/j.1558-5646.1984.tb00346.x)  
1302 [5646.1984.tb00346.x](https://doi.org/10.1111/j.1558-5646.1984.tb00346.x)
- 1303 [ 000 ] Melton, P.E., S. Rutherford, V.S. Voruganti et al. 2010 Bivariate genetic association of  
1304 KIAA1797 with heart rate in American Indians: the Strong Heart Family Study. *Hum*  
1305 *Mol Genet.* 2010 Sep 15;19(18):3662-71. <https://doi.org/10.1093/hmg/ddq274>
- 1306 [ 000 ] Mehr, A. P., M.T. Tran, K. M. Ralto et al. 2018 De novo NAD+ biosynthetic  
1307 impairment in acute kidney injury in humans. *Nat. Med.* 24:1351-1359.  
1308 <https://doi.org/10.1038/s41591-018-0138-z>
- 1309 [ 000 ] Meyer-Vernet, N. and J.P. Rospars 2015 How fast do living organisms move:  
1310 maximum speeds from bacteria to elephants and whales. *Am. J. Phys.* 83:719-722.  
1311 <https://doi.org/10.1119/1.4917310>
- 1312 [ 000 ] Montesinos-Lopez, O.A., A. Montesinos-Lopez, J. Crossa, J. et al., 2018. Multi-trait,  
1313 multi-environment deep learning modeling for genomic-enabled prediction of plant  
1314 traits. *G3:Genes | Genomes | Genetics (Bethesda)* 8:3829-3840.  
1315 <https://doi.org/10.1534/g3.118.200728>

- 1316 [ 000 ] Morris, A.P., C.M. Lindgren, E. Zeggini et al. 2010 A powerful approach to  
1317 subphenotype analysis in population-based genetic association studies. *Genet.*  
1318 *Epidemiol.* 34:335-343. <https://doi.org/10.1002/gepi.20486>
- 1319 [ 000 ] Muñoz, M.L., D. Jaju, S. Voruganti, et al. 2018 Heritability and genetic correlations of  
1320 heart rate variability at rest and during stress in the Oman Family Study. *J. Hypertens.*  
1321 36:1477-1485. <https://doi.org/10.1097/HJH.0000000000001715>
- 1322 [ 000 ] Nei, M. 1960. Studies on the application of biometrical genetics to plant breeding.  
1323 *Memoirs of the College of Agriculture Kyoto University* 82: 1-100.
- 1324 [ 000 ] Ngo, T.T.M., M.N. Moufarrej, M.L. H. Rasmussen et al. 2018 Non-invasive blood tests  
1325 for fetal development predict gestational age and preterm delivery. *Science* 360:1133-  
1326 1136. <https://doi.org/10.1126/science.aar3819>
- 1327 [ 000 ] Nihorimbere, V., M. Ongena, M. Smargiassi, and P. Thonart 2011 Beneficial effect of  
1328 the rhizosphere microbial community for plant growth and health. *Biotechnol. Agron.*  
1329 *Soc. Environ.* 15:327-337.
- 1330 [ 000 ] Niklas, K.J. and U. Kutschera 2015. Kleiber's Law: How the Fire of Life ignited debate,  
1331 fuel theory, and neglected plants as model organisms. *Plant Signalling & Behavior*  
1332 10:7. <https://doi.org/10.1080/15592324.2015.1036216>
- 1333 [ 000 ] Olson, E.C. and R.L. Miller 1958 Morphological integration. University of Chicago  
1334 Press. Chicago, IL.

- 1335 [ 000 ] Oren, Y., A. Nachshon, A. Frishberg, R. Wilentzik, and I. Gat-Viks 2015 Linking traits  
1336 based on their shared molecular mechanisms eLife 4: e04346.  
1337 <https://doi.org/10.7554/eLife.04346>
- 1338 [ 000 ] Org, E., Y. Blum, S. Kasela et al., 2017 Relationship between gut microbiota, plasma  
1339 metabolite and metabolic syndrome traits in the METSIM cohort. Genome Biol. 18:70  
1340 <https://doi.org/10.1186/s13059-017-1194-2>
- 1341 [ 000 ] Ørsted, M. P.D. Rohde, A. A. Hoffmann et al. 2017. Environmental variation  
1342 partitioned into separable heritable components. Evolution 72:136-152.  
1343 <https://doi.org/10.1111/evo.13391>
- 1344 [ 000 ] Park, J., D.S. Lee, N.A. Christakis, A.L. Baraba 2009. The impact of cellular networks on  
1345 disease comorbidity. Molecular Systems Biology 5:262;  
1346 <https://doi.org/10.1038/msb.2009.16>
- 1347 [ 000 ] Peaston AE1, Whitelaw E. 2006 Epigenetics and phenotypic variation in mammals.  
1348 Mamm. Genome 17:365-74. <https://doi.org/10.1007/s00335-005-0180-2>
- 1349 [ 000 ] Pereira, V., D. Waxman, A. Eyre-Walker 2009 A problem with the correlation  
1350 coefficient as a measure of gene expression divergence. Genetics 183:1597-1600.  
1351 <https://doi.org/10.1534/genetics.109.110247>

- 1352 [ 000 ] Perez, M.F., M. Francesconi, C. Hidalgo-Cacedo, B. Lehner 2017. Maternal age  
1353 generates phenotypic variation in *Caenorhabditis elegans*. *Nature* 552:106-109.  
1354 <https://doi.org/10.1038/nature25012>
- 1355 [ 000 ] Pick, J.L., Hutter, P., Tschirren, B.T. 2016. In search of genetic constraints limiting the  
1356 evolution of egg size – direct and correlated responses to artificial selection on a  
1357 prenatal maternal effector. *Heredity* 116:542-549.  
1358 <https://doi.org/10.1038/hdy.2016.16>
- 1359 [ 000 ] Plomin, R. and J.C. DeFries 1979. Multivariate Behavioral Genetic Analysis of Twin  
1360 Data on Scholastic Abilities. *Behavior Genetics* 9(6):505-517.  
1361 <http://dx.doi.org/10.1007/BF01067347>
- 1362 [ 000 ] Poissant, J. A.J. Wilson, D.W. Coltman 2010 Sex-specific genetic variance and the  
1363 evolution of sexual dimorphisms: a systematic review of cross-sex correlations.  
1364 *Evolution* 64:97-107. <https://doi.org/10.1111/j.1558-5646.2009.00793.x>
- 1365 [ 000 ] Polly, P.D. 2008 Developmental dynamics and G-matrices: Can morphometric spaces  
1366 be used to model phenotypic evolution? *Evol. Biol.* 35:83-96.  
1367 <https://doi.org/10.1007/s11692-008-9020-0>
- 1368 [ 000 ] Posthuma, D. , Baaré, W.F.C. , Hulshoff Pol, H.E. , Kahn, R.S. , Boomsma, D.I., De Geus,  
1369 E.J.C. 2003. Genetic Correlations Between Brain Volumes and the WAIS-III  
1370 Dimensions of Verbal Comprehension, Working Memory, Perceptual Organization,  
1371 and Processing Speed. *Twin Research* 6(2) 131-139.

- 1372 [ 000 ] Ramniwas S., B. Kajla, K. Dev, R. Parkash 2013 Direct and correlated responses to  
1373 laboratory selection for body melanisation in *Drosophila melanogaster*: support for  
1374 the melanisation-desiccation resistance hypothesis. J Exp Biol. 216:1244-54.  
1375 <https://doi.org/10.1242/jeb.076166>
- 1376 [ 000 ] Rao, D.C., Rice, T. 2014. Path analysis in genetics. In: Wiley StatsRef: Statistics  
1377 Reference Online. John Wiley and Sons. p. 1-17.  
1378 <https://doi.org/10.1002/9781118445112>
- 1379 [ 000 ] Raup, D.M. 1966 Geometric analysis of shell coiling: general problems. J. Paleontol.  
1380 40:1178-1190.
- 1381 [ 000 ] Roff, D.A. 1996. The Evolution of Genetic Correlations: An Analysis of Patterns.  
1382 Evolution 50(4):1392-1403. <https://doi.org/10.1111/j.1558-5646.1996.tb03913.x>
- 1383 [ 000 ] Rollinson, N., and L. Rowe 2015 Persistent directional selection on body size and a  
1384 resolution to the paradox of stasis. Evolution 69:2441-2451.  
1385 <https://doi.org/10.1111/evo.12753>
- 1386 [ 000 ] Rosado, B.H.P., L.C. Almeida, L.F. Alves et al. 2018 The importance of phyllosphere on  
1387 plant functional ecology: a phyllo manifesto. New Phytol. 219:1145-1149.  
1388 <https://doi.org/10.1111/nph.15235>



- 1389 [ 000 ] Rubin, H. 2016 The phenotypic gambit: selective pressure and EES methodology in  
1390 evolutionary game theory. *Biol. Philos.* 31:551-569. <https://doi.org/10.1007/s10539->  
1391 016-9524-4
- 1392 [ 000 ] Sae-Lim, P., H. Mulder, B. Gjerde et al. 2015 Genetics of Growth Reaction Norms in  
1393 Farmed Rainbow Trout. *PLoS ONE* 10(8): e0135133.  
1394 <https://doi.org/10.1371/journal.pone.0135133>
- 1395 [ 000 ] Saltz, J.B., F.C. Hessel, M.W. Kelly 2017 Trait correlations in the genomic era. *Trends*  
1396 in *Ecol. Evol.* 32:279-290. <https://doi.org/10.1016/j.tree.2016.12.008>
- 1397 [ 000 ] Schaid, D.J., X. Tong, B. Larrabee et al. Statistical methods for testing genetic  
1398 pleiotropy. *Genetics* 204:483-497. <https://doi.org/10.1534/genetics.116.189308>
- 1399 [ 000 ] Searle, S.R. 1961. Phenotypic, genetic and environmental correlations. *Biometrics*  
1400 17(3):474-480.
- 1401 [ 000 ] Sgrò, C.M. and A.A. Hoffman 2004 Genetic correlations, tradeoffs and environmental  
1402 variation. *Heredity* 93:241-248. <https://doi.org/10.1038/sj.hdy.6800532>
- 1403 [ 000 ] Short, P.J., J.F. McRae, G. Gallone et al. 2018. De novo mutations in regulatory  
1404 elements in neurodevelopmental disorders. *Nature* 555:611-616.  
1405 <https://doi.org/10.1038/nature25983>

- 1406 [ 000 ] Sikkink, K.L. R.M. Reynolds, W.A. Cresko et al. 2015 Environmentally induced changes  
1407 in correlated responses to selection reveal variable pleiotropy across complex genetic  
1408 network. *Evolution* 69:1128-1142. <https://doi.org/10.1111/evo.12651>
- 1409 [ 000 ] Singh, N.D. and K.L. Shaw 2012 On the scent of pleiotropy. *PNAS* 109:5-6.  
1410 <https://doi.org/10.1073/pnas.1118531109>
- 1411 [ 000 ] Sölkner, J., H. Grausgruber, A.M. Oyeko et al. 2008 Breeding objectives and the  
1412 relative importance of traits in plant and animal breeding: a comparative review.  
1413 *Euphytica* 161:273-282. <https://doi.org/10.1007/s10681-007-9507-2>
- 1414 [ 000 ] Solovieff, N., Cotsapas, C., Lee, P.H., Purcell, S.M., Smoller, J.W. 2013. Pleiotropy in  
1415 complex traits: challenges and strategies. *Nature Reviews* 14:483-495.  
1416 <https://doi.org/10.1038/nrg3461>
- 1417 [ 000 ] Stearns, S.C. 1989 Trade-offs in life history evolution. *Functional Ecology* 3:259-268.  
1418 <https://doi.org/10.2307/2389364>
- 1419 [ 000 ] Stearns, S. G. de Jong, B. Newman 1991 The effects of phenotypic plasticity on  
1420 genetic correlations. *TREE* 6, 122–6. [https://doi.org/10.1016/0169-5347\(91\)90090-K](https://doi.org/10.1016/0169-5347(91)90090-K)
- 1421 [ 000 ] Stoddard MC, Yong EH, Akkaynak D, Sheard C, Tobias JA, Mahadevan L 2017. Avian  
1422 egg shape: Form, function, and evolution. *Science* 356(6344):1249-1254.  
1423 <https://doi.org/10.1126/science.aaj1945>

- 1424 [ 000 ] Sun J., H.R. Kranzler, J. Bi 2015 An Effective Method to Identify Heritable Components  
1425 from Multivariate Phenotypes. PLoS ONE 10(12):e0144418.  
1426 <https://doi.org/10.1371/journal.pone.0144418>
- 1427 [ 000 ] Sun, J., J.E. Rutkoski, J.A. Poland et al. 2017 Multitrait, random regression, or simple  
1428 repeatability model in high-throughput phenotyping data improve genomic  
1429 prediction for wheat grain yield. Plant Genome 10 No 2  
1430 <https://doi.org/10.3835/plantgenome2016.11.0111>
- 1431 [ 000 ] te Pas, M.F.W., O. Madsen, M.P.L. Calus et al. 2017 The importance of  
1432 endophenotypes to evaluate the relationship between genotype and external  
1433 phenotype. Intl. J. Mol. Sci. 18:472. <https://doi.org/10.3390/ijms18020472>
- 1434 [ 000 ] Teich, A.F., Sakurai, M., Patel, M. et al. 2016 PDE5 Exists in Human Neurons and is a  
1435 Viable Therapeutic Target for Neurologic Disease. Journal of Alzheimer’s Disease  
1436 52:295–302. <https://doi.org/10.3233/JAD-151104>
- 1437 [ 000 ] Traglia, M., Bseiso, D., Gusev, A., et al. 2017 Genetic Mechanisms Leading to Sex  
1438 Differences Across Common Diseases and Anthropometric Traits. Genetics 205:979-  
1439 992. <https://doi.org/10.1534/genetics.116.193623>
- 1440 [ 000 ] Tyler, A.L., F.W. Asselberg, S.M. Williams et al., 2009 Shadows of complexity: what  
1441 biological networks reveal about epistasis and pleiotropy. Bioessays 31:220-227.  
1442 <https://doi.org/10.1002/bies.200800022>

- 1443 [ 000 ] Valdes, A.M. J. Walter, E. Segal, T.D. Spector 2018 Role of the gut microbiota in  
1444 nutrition and health. *BMJ* 361:k2179. <https://doi.org/10.1136/bmj.k2179>
- 1445 [ 000 ] Waitt, D. E., Levin, D.A. 1998. Genetic and phenotypic correlations in plants: a  
1446 botanical test of Cheverud's conjecture. *Heredity* 80:310-  
1447 310. <https://doi.org/10.1046/j.1365-2540.1998.00298.x>
- 1448 [ 000 ] Wambua, S., J. Mwacharo, S. Uyoga et al. 2006. Co-inheritance of alpha+  
1449 thalassaemia and sickle trait results in specific effects on haematological parameters.  
1450 *Br. J. Haematol.* 2006 Apr;133(2):206-9. [https://doi.org/10.1111/j.1365-](https://doi.org/10.1111/j.1365-2141.2006.06006.x)  
1451 [2141.2006.06006.x](https://doi.org/10.1111/j.1365-2141.2006.06006.x)
- 1452 [ 000 ] Wang, H. G., H. Poon, N. J. Cox, A. Rzhetsky 2017 Classification of common human  
1453 diseases derived from shared genetic and environmental determinants. *Nat Genet.*  
1454 49: 1319–1325. <https://doi.org/10.1038/ng.3931>
- 1455 [ 000 ] Wang K, Gaitsch H, Poon H, Cox NJ, Rzhetsky AQ 2017 Classification of common  
1456 human diseases derived from shared genetic and environmental determinants.  
1457 *Nature Genetics* 49:1319–1325. <https://doi.org/10.1038/ng.3931>
- 1458 [ 000 ] Wellman, A., B. A. Edwards, S. A. Sands, R. L. Owens et al. 2013 A simplified method  
1459 for determining phenotypic traits in patients with obstructive sleep apnea *J Appl*  
1460 *Physiol* 114: 911–922. <https://doi.org/10.1152/jappphysiol.00747.2012>

- 1461 [ 000 ] Willis, J. H., J. A. Coyne, and M. Kirpatrick 1991 Can one predict the evolution of  
1462 quantitative characters without genetics? *Evolution* 45:441–444.  
1463 <https://doi.org/10.1111/j.1558-5646.1991.tb04418.x>
- 1464 [ 000 ] Wicklin, R. 2013. *Simulating with SAS®*. SAS Institute, Cary, NC.
- 1465 [ 000 ] Willmore, K.E., C.C. Roseman, J. Rogers, J. M. Cheverud, J. T. Richtsmeier 2009.  
1466 Comparison of Mandibular Phenotypic and Genetic Integration between Baboon and  
1467 Mouse. *Evol Biol.* 2009 March ; 36(1): 19–36. [https://doi.org/10.1007/s11692-009-](https://doi.org/10.1007/s11692-009-9056-9)  
1468 [9056-9](https://doi.org/10.1007/s11692-009-9056-9)
- 1469 [ 000 ] Wissuwa, M., M. Mazzola, C. Piccard 2009 Novel approaches in plant breeding for  
1470 rhizosphere-related traits. *Plant Soil* 321:409-430. [https://doi.org/10.1007/s11104-](https://doi.org/10.1007/s11104-008-9693-2)  
1471 [008-9693-2](https://doi.org/10.1007/s11104-008-9693-2).
- 1472 [ 000 ] Wu, T., Boezen,H.M., Postma,D.S., Los,H. , Postmus, P.E., Snieder, H., Boomsmae,  
1473 D.I. 2010. Genetic and environmental influences on objective intermediate asthma  
1474 phenotypes in Dutch twins. *Eur Respir J* 2010; 36: 261–268.  
1475 <https://doi.org/10.1183/09031936.00123909>
- 1476 [ 000 ] Wu, T., Treiber, F.A., H. Snider, H. 2013. Genetic influence on blood pressure and  
1477 underlying hemodynamics measured at rest and during stress. *Psychosom Med.* 75(4):  
1478 404–412. <https://doi.org/10.1097/PSY.0b013e31828d3cb6>

- 1479 [ 000 ] **Xavier, A., B., Hall, S. Castel et al. 2017 Using unsupervised learning techniques to**  
1480 **assess interactions among complex traits in soybeans. *Euphytica* 213:200.**  
1481 **<https://doi.org/10.1007/s10681-017-1975-4>**
- 1482 [ 000 ] **Zera, A.J. and L.G. Harshman 2001 The physiology of life history trade-offs in**  
1483 **animals. *Ann. Rev. Ecol. Syst.* 32:95-126.**  
1484 **<https://doi.org/10.1146/annurev.ecolsys.32.081501.114006>**
- 1485 [ 000 ] **Yamada, Y. 1968. On the Realized heritability and genetic correlation estimated from**  
1486 **double selection experiments when two characters are measured *Japan. Poultry Sci.***  
1487 **5(3):148-151.**
- 1488 [ 000 ] **Yang, C., C. Li, Q. Wang et al. 2015 Implications of pleiotropy: challenges and**  
1489 **opportunities for mining Big Data in biomedicine. *Front. Genet.* 6:229 .**  
1490 **<https://doi.org/10.3389/fgene.2015.00229>**
- 1491 [ 000 ] **Yang, C., X. Wang, J. Liu, M. Ng 2016. Introduction to statistical methods for**  
1492 **integrative data analysis in genome-wide association studies. In: K.-C. Wong (ed) *Big***  
1493 ***Data Analytics in Genomics.* Springer. [http://doi.org/10.1007/978-3-319-41279-5\\_1](http://doi.org/10.1007/978-3-319-41279-5_1)**
- 1494 [ 000 ] **Yang, J., Zeng, J., M.E. Goddard, N.R. Wray, P.M. Visscher 2017 Concepts, estimation**  
1495 **and interpretation of SNP-based heritability. *Nature Genetics* 49:1304–1310.**  
1496 **<http://doi.org/10.1038/ng.3941>**

- 1497 [ 000 ] Yin, P., Anttila, V., Siewert, K.M., Palotie, A., Smith, G.D., Voight, B.F. 2017. Serum  
1498 calcium and risk of migraine: a Mendelian randomization study. *Human Molecular*  
1499 *Genetics* 26(4)820–828. <https://doi.org/10.1093/hmg/ddw416>
- 1500 [ 000 ] Zhang, Y.Y., Z.Y. Fu, J. Wei et al. 2018 A *LIMAI* variant promotes low plasma LDL  
1501 cholesterol and decreases intestinal cholesterol absorption. *Science* 360:1087-1092.  
1502 <https://doi.org/10.1126/science.aao6575>
- 1503 [ 000 ] Zhang, Y., Z. Liang, H.-T. Hsueh, V. A. et al . 2012 Characterization of Streptokinases  
1504 from Group A Streptococci Reveals a Strong Functional Relationship That Supports the  
1505 Coinheritance of Plasminogen-binding M Protein and Cluster 2b Streptokinase. *J. Biol.*  
1506 *Chem.* 287: 42093–42103. <https://doi.org/10.1074/jbc.M112.417808>
